# Supplementary material
Source: PubMed Central journal article supplement (PMC7128463)
Supplement: mmc2.pdf [file mmc2.pdf]

# Immunity

## A Conserved Histidine in the RNA Sensor RIG-I Controls Immune Tolerance to N<sub>1</sub>-2'-O-Methylated Self RNA

### Graphical Abstract

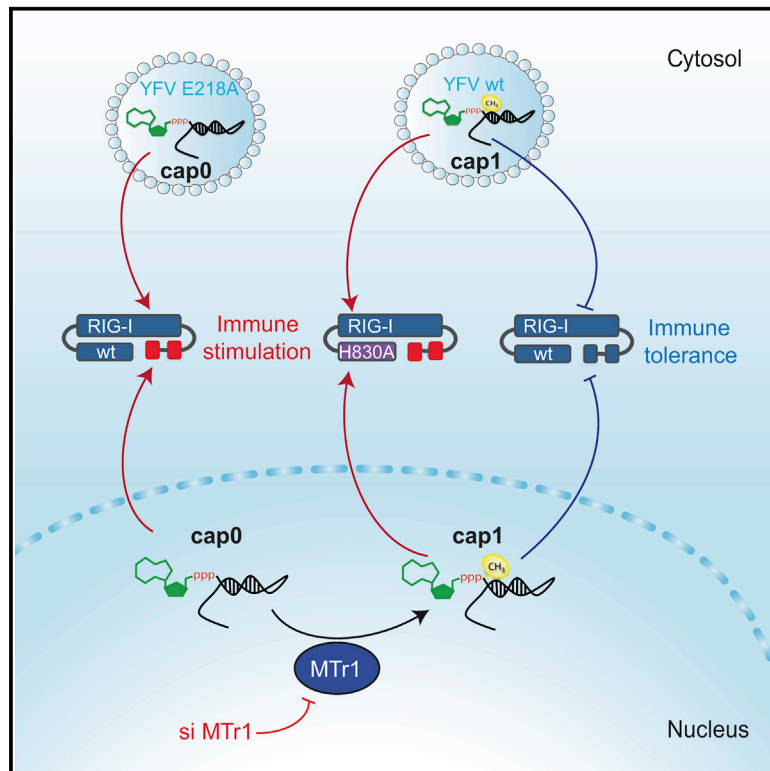

### Authors

Christine Schuberth-Wagner, Janos Ludwig, Ann Kristin Bruder, ..., Beate M. Kümmerer, Gunther Hartmann, Martin Schlee

### Correspondence

martin.schlee@uni-bonn.de

### In Brief

The cytosolic receptor RIG-I initiates immune responses against most RNA viruses by detecting viral RNA. Schlee and colleagues report that a conserved amino acid in the RNA binding pocket prevents recognition of endogenous RNA bearing a N<sub>1</sub>-2'-O-methyl group as a marker of “self” and that flaviviruses exploit this tolerance mechanism for immunoescape.

### Highlights

- N<sub>1</sub>-2'-O-methylation is crucial to block RIG-I activation by viral and self RNA
- Self-RNA exclusion is singularly governed by the conserved H830 in RIG-I
- H830A alteration leads to indiscriminate recognition of endogenous RNA by RIG-I
- Cellular N<sub>1</sub>-2'-O-methyltransferase knockdown renders endogenous RNA stimulatory

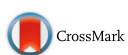

# A Conserved Histidine in the RNA Sensor RIG-I Controls Immune Tolerance to N<sub>1</sub>-2'-O-Methylated Self RNA

Christine Schuberth-Wagner,<sup>1,7</sup> Janos Ludwig,<sup>1,7</sup> Ann Kristin Bruder,<sup>1,7</sup> Anna-Maria Herzner,<sup>1</sup> Thomas Zillinger,<sup>1,2</sup> Marion Goldeck,<sup>1</sup> Tobias Schmidt,<sup>3</sup> Jonathan L. Schmid-Burgk,<sup>3</sup> Romy Kerber,<sup>4</sup> Steven Wolter,<sup>1</sup> Jan-Philip Stümpel,<sup>1</sup> Andreas Roth,<sup>1,6</sup> Eva Bartok,<sup>1</sup> Christian Drosten,<sup>5</sup> Christoph Coch,<sup>1</sup> Veit Hornung,<sup>3</sup> Winfried Barchet,<sup>1,2</sup> Beate M. Kümmerer,<sup>5</sup> Gunther Hartmann,<sup>1,8</sup> and Martin Schlee<sup>1,8,\*</sup>

<sup>1</sup>Institute of Clinical Chemistry and Clinical Pharmacology, University Hospital, University of Bonn, 53105 Bonn, Germany

<sup>2</sup>German Center for Infection Research Cologne-Bonn

<sup>3</sup>Institute of Molecular Medicine, University Hospital, University of Bonn, 53105 Bonn, Germany

<sup>4</sup>Department of Virology, Bernhard-Nocht-Institute for Tropical Medicine, 20259 Hamburg, Germany

<sup>5</sup>Institute of Virology, University of Bonn Medical Centre, 53127 Bonn, Germany

<sup>6</sup>Present address: Department of Otolaryngology, Head and Neck Surgery, University of Tübingen, 72076 Tübingen, Germany

<sup>7</sup>Co-first author

<sup>8</sup>Co-senior author

\*Correspondence: [martin.schlee@uni-bonn.de](mailto:martin.schlee@uni-bonn.de)

<http://dx.doi.org/10.1016/j.immuni.2015.06.015>

## SUMMARY

The cytosolic helicase retinoic acid-inducible gene-1 (RIG-I) initiates immune responses to most RNA viruses by detecting viral 5'-triphosphorylated RNA (pppRNA). Although endogenous mRNA is also 5'-triphosphorylated, backbone modifications and the 5'-ppp-linked methylguanosine (<sup>m7</sup>G) cap prevent immunorecognition. Here we show that the methylation status of endogenous capped mRNA at the 5'-terminal nucleotide (N<sub>1</sub>) was crucial to prevent RIG-I activation. Moreover, we identified a single conserved amino acid (H830) in the RIG-I RNA binding pocket as the mediator of steric exclusion of N<sub>1</sub>-2'-O-methylated RNA. H830A alteration (RIG-I(H830A)) restored binding of N<sub>1</sub>-2'-O-methylated pppRNA. Consequently, endogenous mRNA activated the RIG-I(H830A) mutant but not wild-type RIG-I. Similarly, knockdown of the endogenous N<sub>1</sub>-2'-O-methyltransferase led to considerable RIG-I stimulation in the absence of exogenous stimuli. Studies involving yellow-fever-virus-encoded 2'-O-methyltransferase and RIG-I(H830A) revealed that viruses exploit this mechanism to escape RIG-I. Our data reveal a new role for cap N<sub>1</sub>-2'-O-methylation in RIG-I tolerance of self-RNA.

## INTRODUCTION

Most highly pathogenic and emerging viruses are RNA genome-based viruses, giving rise to zoonotic and epidemic diseases (e.g., influenza) or causing viral hemorrhagic fever (yellow fever, dengue fever, Lassa fever, Ebola disease) (Bray, 2008). The first barrier against invasion of RNA viruses is a cytosolic innate intracellular defense response that is present in all cell types and is

initiated by activation of the viral RNA-sensing innate immune receptors RIG-I (retinoic acid-inducible gene 1) and MDA5 (melanoma differentiation-associated protein 5) in the cytosol (Gitlin et al., 2006; Kato et al., 2006; Loo et al., 2008). Upon sensing of viral RNA, RIG-I or MDA5 induces type I interferon (IFN) secretion leading to upregulation of antiviral IFN-induced proteins in the infected and neighboring cells, which inhibits virus replication or protects against new infection. Further downstream events attract immune cells and trigger the adaptive immune response.

Discrimination of a few viral RNA molecules from the abundant host RNA in the cytosol occurs by detection of unusual structures or modifications of the viral RNA. The structural features leading to recognition by MDA5 have remained elusive. By contrast, because of high-resolution structures of RIG-I/ligand complexes, the mechanism of RNA recognition by RIG-I is well understood (Civril et al., 2011; Jiang et al., 2011; Kowalinski et al., 2011; Lu et al., 2010; Luo et al., 2011; Wang et al., 2010). RIG-I is activated by double-stranded 5'-triphosphorylated RNA (ppp-dsRNA) (Hornung et al., 2006; Pichlmair et al., 2006; Schlee and Hartmann, 2010; Schlee et al., 2009). Like most viral RNAs, endogenous mRNA and RNA polymerase III transcripts are also 5'-triphosphorylated. However, mRNAs of eukaryotes possess a cap structure consisting of a triphosphorylated 5' end that is 5'-5' linked to a guanosine methylated at N<sub>7</sub> (<sup>m7</sup>G) (Figure 1A). The <sup>m7</sup>G cap is essential for eIF4a-dependent mRNA-dependent protein translation from yeast to vertebrates. 2'-O-methyl modifications at N<sub>1</sub> and N<sub>2</sub> are conserved features of mRNA cap structures of higher eukaryotes (Banerjee, 1980) but haven't been implicated in mRNA translation control so far (Bélanger et al., 2010). A number of differences between eukaryotic RNA and microbial RNAs have been described that explain the discrimination of self and non-self by RIG-I. Apart from the presence of a 5'-triphosphate moiety in fully base-paired regions in various microbial RNA species, this also includes certain modifications in eukaryotic RNAs that exert an inhibitory function on otherwise stimulatory RNA molecules. This includes backbone and nucleobase modifications in eukaryotic RNAs, as well as <sup>m7</sup>G cap

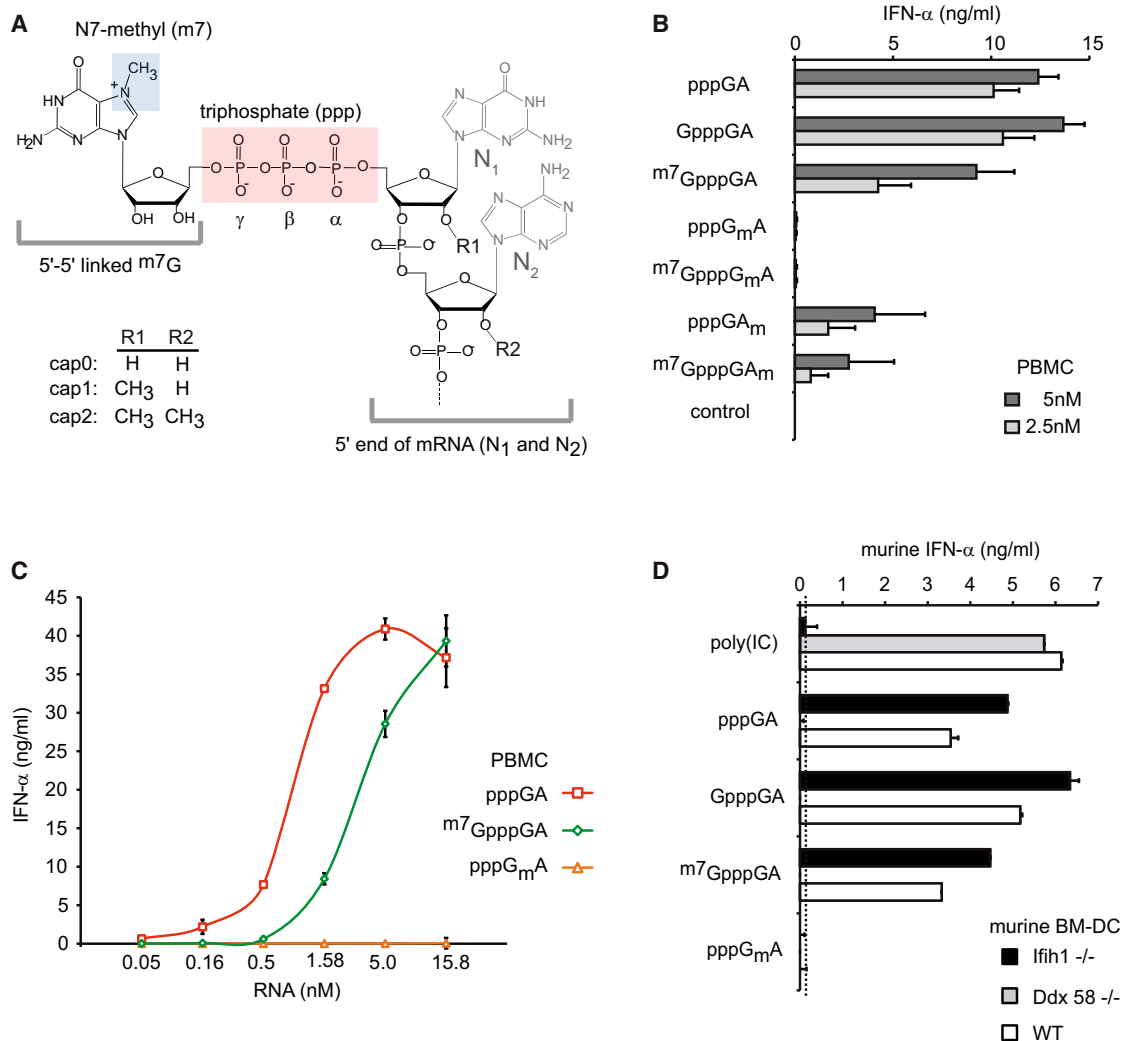

**Figure 1. 2'O-Methylation at N<sub>1</sub> Position of RNA Critically Determines the Abolition of RIG-I Activation**

(A) The chemical structure of cap structures as contained in eukaryotes' mRNA is presented (<sup>m7</sup>GpppN<sub>m</sub>N<sub>m</sub>). Important structural features are labeled. The cap2 structure, which occurs only in higher eukaryotes' mRNA, consists of a G, 5'-5' triphosphate linked to N<sub>1</sub>, with methylation at N<sub>7</sub> of the G residue. N<sub>1</sub> and N<sub>2</sub> are 2'O-methylated.

(B and C) Chloroquine-treated human PBMCs were stimulated with the indicated synthetic RNA oligonucleotides (see also Table S1 and Figure S2) at concentrations of 2.5 nM and 5 nM (B) or a dose titration was performed (C). Before stimulation, RNA oligonucleotides were hybridized with the complementary RNA (AsGA) to blunt-ended double-stranded RNA. IFN- $\alpha$  production was analyzed 20 hr after stimulation. Data from four donors are depicted as mean values + SEM. (D) Murine bone-marrow-derived dendritic cells from MDA5- or RIG-I-deficient or wild-type mice were stimulated with indicated RNA ligands (50 nM) and murine IFN- $\alpha$  was determined by ELISA (linear range limit: 80 pg/ml) 20 hr after transfection. One representative experiment out of two is shown. Error bars indicate SD.

modification of eukaryotic mRNAs (Hornung et al., 2006; Pichlmair et al., 2006). The relative contribution of these activating or inhibiting signatures in putative RIG-I ligands remains to be determined, especially in light of the fact that in vitro transcription was used to study the impact of the latter modifications (Goubau et al., 2014; Schlee et al., 2009; Schmidt et al., 2009; see Supplemental Experimental Procedures). In the present study, by using synthetic pppRNA, we re-assessed the impact of <sup>m7</sup>G on RIG-I stimulation and analyzed also the influence of single modifications (including G methylation at N<sub>7</sub> and 2'O-methylation of the N<sub>1</sub> and N<sub>2</sub> position of the RNA) on the interaction with RIG-I. We found that a <sup>m7</sup>G cap alone could only partially reduce RIG-I stimulation at low RIG-I ligand concentrations, whereas

the 2'O-methylation of the 5'-terminal nucleotide (N<sub>1</sub>) entirely abrogated RIG-I activation even at high ligand concentrations. Structure-guided mutational analysis led to the identification of a highly conserved histidine (H830) in the RNA binding domain of RIG-I, which is dispensable for RIG-I activation but mediates steric exclusion of N<sub>1</sub>-methylated RNA. We furthermore provide evidence that endogenous RNA stimulated RIG-I in the absence of endogenous cap1 2'O-methylation or if H830 was mutated. Furthermore, we demonstrated that RNA viruses exploited this tolerance mechanism to avoid recognition by RIG-I. The 100% conservation of this "licensing" histidine position in RIG-I among vertebrates and even sea anemone RIG-I highlights a fundamental role of this self-RNA tolerance mechanism in evolution.

As such, this is the first study showing the biological relevance of endogenous cap 2'-O-methylation and the corresponding enzymes for immune tolerance of self-RNA, a pathway that is relevant for any cell type in the body.

## RESULTS

### 2'-O-Methylation at the N<sub>1</sub> Position of RNA Critically Determines the Abolition of RIG-I Activation

Capping of mRNA is required for effective ribosomal translation. Three forms of cap structures are known: cap0 is a N<sub>7</sub>-methyl guanosine (<sup>m7</sup>G) linked to the gamma phosphate of the 5'-triphosphate of RNA (<sup>m7</sup>GpppNN; N = nucleotide; Figure 1A); cap1 is identical to cap0 except for an additional 2'-O-methyl group at the N<sub>1</sub> position (<sup>m7</sup>GpppN<sub>m</sub>N); and cap2 carries a second 2'-O-methyl group at the N<sub>2</sub> position (<sup>m7</sup>GpppN<sub>m</sub>N<sub>m</sub>). Although the cap N<sub>7</sub>-methyl guanosine in cap structures is well known to be required for effective ribosomal translation, the impact of the 2'-O-methyl groups at N<sub>1</sub> and N<sub>2</sub> on translation is unclear. So far, it has been described that replication of (+) ssRNA viruses lacking the viral N<sub>1</sub>-2'-O-methyl transferase is restricted by the type I IFN-induced, pppRNA binding protein IFIT1 (Abbas et al., 2013; Daffis et al., 2010; Habjan et al., 2013; Pichlmair et al., 2011). To study the impact of the different components of cap structures on immunorecognition of RNA by RIG-I, we established methods to generate well-characterized 24-mer RNA oligonucleotides with identical sequence and containing a 5'-triphosphate with additional single or combined features of the cap0/1/2 structures (e.g., with or without guanosine cap, N<sub>7</sub>-methylated guanosine cap, 2'-O-methyl at N<sub>1</sub> or N<sub>2</sub>; see Figures S2A–S2E and Table S1). These RNA oligonucleotides were hybridized with complementary RNA (antisense RNA oligonucleotide: AsGA; Table S1) resulting in short double-stranded blunt-end RNA oligonucleotides (ppp-dsRNA). The double-stranded RNA oligonucleotides were transfected into human peripheral blood mononuclear cells (PBMCs) in the presence of chloroquine, which eliminates endosomal TLR-mediated recognition. In this setting, IFN- $\alpha$  induction by short ppp-dsRNA is exclusively mediated by RIG-I (Schlee et al., 2009; Wang et al., 2010). We found that 5'ppp5'-linked G (GpppGA) did not impair RIG-I activation (Figure 1B), whereas N<sub>7</sub>-methylation of the 5'ppp5'-linked G (cap0 = <sup>m7</sup>GpppGA; Figure 1B) only partially reduced IFN- $\alpha$  induction at the concentrations used (2.5 nM). In dose response experiments, complete inhibition of RIG-I activation by <sup>m7</sup>G cap was seen at concentrations below 0.5 nM (Figure 1C). By contrast, a single 2'-O-methyl group at N<sub>1</sub> (pppG<sub>m</sub>A) completely abolished RIG-I activation at all RNA concentrations tested (up to 15.8 nM; Figures 1B and 1C). The combination of the 2'-O-methyl group at N<sub>1</sub> and <sup>m7</sup>G as in cap1 (<sup>m7</sup>GpppG<sub>m</sub>A; Figure 1B) also showed no activity. However, 2'-O-methylation at N<sub>2</sub> with and without <sup>m7</sup>G (<sup>m7</sup>GpppGA<sub>m</sub>, pppGA<sub>m</sub>) only partially reduced the RIG-I activity (Figure 1B). These data reveal a dominant role of the 2'-O-methyl group at N<sub>1</sub> for the inability of RIG-I to sense capped pppRNA. Stimulation of bone-marrow-derived dendritic cells (BM-DCs) deficient for *Irfh1* (encoding MDA5) or *Ddx58* (encoding RIG-I) with ligands comprising different cap structures confirmed the exclusive detection of capped pppRNA by RIG-I and the absolute inhibitory effect of 2'-O-methylation (Figure 1D).

### The Amino Acid H830 in the RNA Binding Domain of RIG-I Is Responsible for Steric Exclusion of N<sub>1</sub>-2'-O-Methylated cap1 RNA

RIG-I is composed of two N-terminal signaling adaptor domains (CARD), a helicase domain (DECH), and the C-terminal domain (CTD), which was identified to harbor the pppRNA binding site (Cui et al., 2008; Takahasi et al., 2008). The CTD possesses a basic binding cleft with ppp-dsRNA-CTD interactions at amino acids F853 (5'-terminal base pair stacking), K858, H847, K861, K888 (ppp binding), K907 (internucleotide phosphate binding), and H830 (contact to 2'-OH of N<sub>1</sub>) (Lu et al., 2010; Wang et al., 2010). We mutated selected amino acids of the binding pocket of RIG-I to alanine and expressed the full-length RIG-I constructs in HEK293<sup>blue</sup> cells, which lack RIG-I activity, if not primed by type I IFN. The *IP10* gene is known to be directly activated by RIG-I (Brownell et al., 2014). IP10 secretion was studied as a surrogate parameter of RIG-I activation after stimulation with synthetic ppp-dsRNA or ppp-ssRNA (Figure 2A). The highly conserved amino acids F853, K861, K888, and K907 (Figure S1), which are part of the basic ppp-dsRNA binding cleft of the CTD domain, were essential for RIG-I activation by ppp-dsRNA (Figure 2A). Although the highly conserved H830 is in contact with 2'-OH of N<sub>1</sub>, the H830A mutation did not decrease but instead increased ppp-dsRNA-induced RIG-I stimulation (Figure 2A). Immunoblot analysis confirmed that this increase was not due to higher expression of the mutated RIG-I(H830A) (Figure 2B). Indeed, its 100% conservation across all known vertebrate species and sea anemone RIG-I (Figure S1) points to a key function of H830 in RIG-I biology. Because H830 is not required for RIG-I activation and given its position in proximity to N<sub>1</sub>, we speculated that H830 might be involved in a steric interference of the 2'-O-methyl group (trans-C3'-oriented) through its side chain (Figure 2C; Wang et al., 2010). To address this hypothesis, we performed a set of experiments in which we compared wild-type (WT) RIG-I to RIG-I(H830A) by using different pppRNA ligands. Indeed, in contrast to RIG-I(WT), the RIG-I(H830A) mutant was still activated by ppp-dsRNA containing 2'-O-methyl at N<sub>1</sub> (pppG<sub>m</sub>A) and showed considerable activation in the presence of a complete cap1 structure (<sup>m7</sup>GpppG<sub>m</sub>A) (Figure 2D, black bars).

By using a homogenous ligand interaction assay, we analyzed the binding affinity of RIG-I(WT) and RIG-I(H830A) to the different ppp-RNAs (Figures 2E–2G). Consistent with reduced RIG-I-stimulating activity, binding of pppG<sub>m</sub>A to RIG-I(WT) was 4.5-fold diminished in comparison to pppGA, and 5'ppp5'-linked <sup>m7</sup>G (<sup>m7</sup>GpppGA) also inhibited binding but to a lower extent (~2-fold) (Figures 2E and 2G). The binding of cap1-bearing dsRNA (<sup>m7</sup>GpppG<sub>m</sub>A) to RIG-I(WT) was lower than the detection limit of the assay (Figures 2E and 2G; K<sub>d</sub> > 1,000 nM).

Similar to RIG-I(WT), the cap0 structure (<sup>m7</sup>GpppGA) reduced binding of RIG-I(H830A) 2-fold, demonstrating that H830 does not interfere with the <sup>m7</sup>G cap. In contrast to RIG-I(WT) and consistent with the functional activity, binding of RIG-I(H830A) to pppRNA with and without 2'-O-methylation at N<sub>1</sub> was nearly equal (Figures 2F and 2G). In line with this result, RNA with a complete cap1 structure (<sup>m7</sup>GpppG<sub>m</sub>A) bound to RIG-I(H830A) to an extent comparable to the non-2'-O-methylated cap0-bearing RNA (<sup>m7</sup>GpppGA) (Figures 2F and 2G).



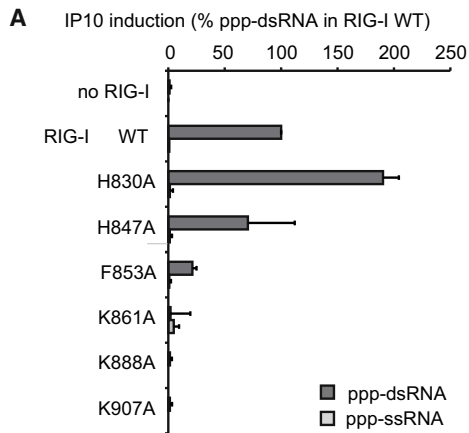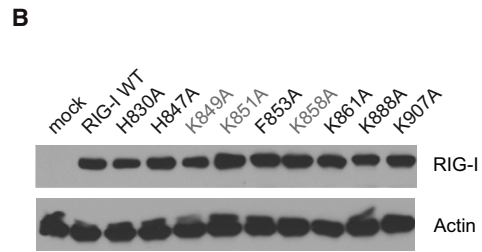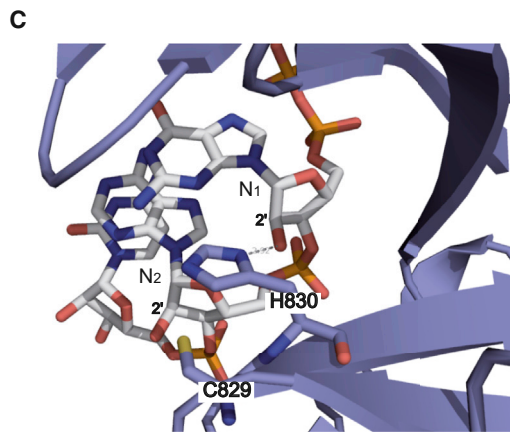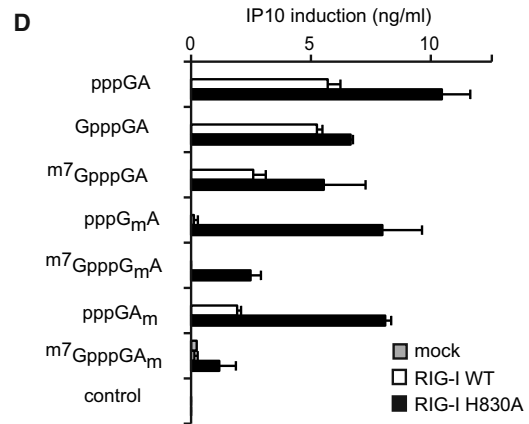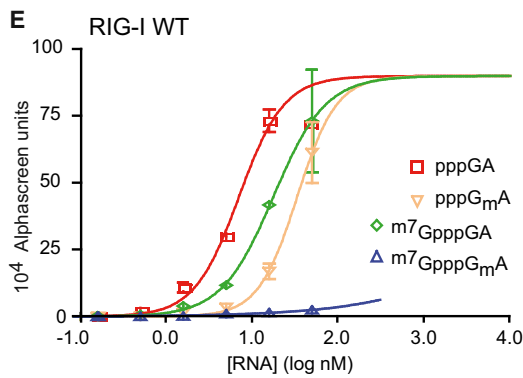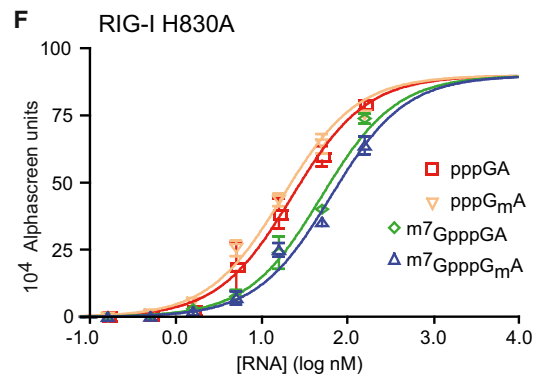

**G**

| $K_d$ (app)/nM         | □ WT        | ■ H830A |
|------------------------|-------------|---------|
| pppGA                  | 7.5         | 22.5    |
| pppG <sub>m</sub> A    | 33.5        | 17.5    |
| m7GpppGA               | 17.5        | 49      |
| m7GpppG <sub>m</sub> A | n.d.(>1000) | 63      |

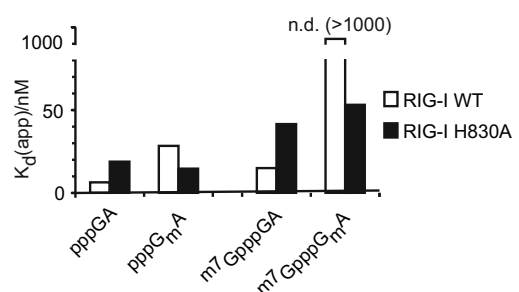

(legend on next page)

Of note, pppG<sub>m</sub>A did still demonstrate some residual binding to RIG-I(WT) in the AlphaScreen assay although the assay cannot resolve the binding site. One possible explanation for this residual interaction with RIG-I(WT) could be non-productive binding as reported previously (Marq et al., 2011). Here, RIG-I binding was reported for ligands that could not activate RIG-I or induce type I IFN. In particular, dsRNA with an overhanging 5'-ppp-nucleotide (ppp(+1nt)-dsRNA) was observed to be a weak competitor for blunt ppp-dsRNA (Marq et al., 2011). To test whether N<sub>1</sub>-2'-O-methylation has similar effects as a 5'-ppp-overhang, we performed a competition assay as described previously (Marq et al., 2011). We transfected ppp-dsRNA as pppGA hybridized to asGA (pppGA+asGA) mixed with a 24-fold excess of asGA (single-stranded control, non-binder), pppGmA+asGA (blunt N<sub>1</sub>-2'-O-methylated), or pppGA+asGA(-1) (ppp(+1nt)-dsRNA, non-productive binder) (Figure S2F; Marq et al., 2011). Although ppp(+1nt)-dsRNA, as previously published, reduced RIG-I stimulation by ppp-dsRNA 2-fold, no competitive inhibition via N<sub>1</sub>-2'-O-methylated ppp-dsRNA (pppGmA) could be detected. Thus, unlike ppp(+1nt)-dsRNA, pppGmA binding does not seem to be sufficient to block binding of pppGA in this setting.

Altogether, the results provide strong evidence that H830 impairs accurate binding of N<sub>1</sub>-2'-O-methylated RNA via steric hindrance, leading to immune ignorance of 2'-O-methylated pppRNA.

### H830 and cap1 N<sub>1</sub>-2'-O-Methylation of Self RNA Prevent Immunorecognition of Endogenous RNAs

The high conservation of H830 in RIG-I and its function in interference with accurate binding of 5'-triphosphate RNA carrying a 2'-O-methyl group at N<sub>1</sub> suggest the existence of self-RNA molecules that depend on N<sub>1</sub> methylation to evade recognition by RIG-I. Although base-paired 5'-triphosphate RNA is required for RIG-I stimulation, GpppNN-RNA intermediates with such RIG-I ligand properties might occur, causing some degree of immune stimulation in the absence of 2'-O-methylation (or in the presence of the mutated form of RIG-I that accepts 2'-O-methylation). Indeed, we found that long-term expression of RIG-I(H830A) in HEK293<sup>blue</sup> cells lacking RIG-I activity led to a significant IP10 response in the absence of exogenous RIG-I ligand (Figure 3A, black bars). To show that IP10 induction is induced by endogenous RNA species, we overexpressed RIG-I-CTD-FLAG in HEK293<sup>blue</sup> cells and purified endogenous RNA bound to immunoprecipitated RIG-I-CTD-FLAG (Figure 3B, left). RIG-I-bound endogenous RNA stimulated the RIG-I(H830A)

mutant but not RIG-I(WT) (Figure 3B, right). The RIG-I-stimulating activity of isolated endogenous RNA was partially sensitive to alkaline phosphatase (AP), which hydrolyzes free phosphates, and to treatment with tobacco acid pyrophosphatase (TAP), which hydrolyzes the triphosphate bridge of mRNA caps (Figure S3A). However, only the combined treatment abolished RIG-I stimulation, indicating the presence of stimulatory capped and uncapped pppRNA species (Figure 3B). It was reported that mRNA cap1 2'-O-methylation occurs in the nucleus and is performed by the endogenous cap1 methyltransferase MTr1 (Bé-langer et al., 2010; Perry and Kelley, 1976). To study the impact of diminished 2'-O-methylation of endogenous RNA transcripts, we knocked down hMTr1 in primary human fibroblasts (Figures 3C and S3B). Intriguingly, inhibition of endogenous cap methylation induced a substantial type I IFN response 72 hr after hMTr1 knock down (Figure 3C). Correspondingly, siRNA-mediated knock-down of MTr1 induced IFN- $\beta$  mRNA in primed A549 cells (Figure 3D). By contrast, RIG-I-deficient A549 cells did not upregulate IFN- $\beta$  upon depletion of MTr1 (Figures 3D and S3C). A similar scenario held true in HEK293<sup>blue</sup> cells silenced for hMTr1 (Figures 3E and S3D) and lacking significant endogenous RIG-I activity. Expression of RIG-I(WT) in combination with knockdown of hMTr1 (Figure 3E, right) led to increased IP10 production as compared to the control setting (Figure 3E, left). Overexpression of RIG-I(H830A) by itself also led to an increased IP10 response, yet additional silencing of hMTr1 did not considerably augment RIG-I(H830A)-induced IP10 levels (Figure 3E, right). Altogether these results indicated that hMTr1 activity was required for an active suppression of endogenous RNA recognition by RIG-I.

### Yellow Fever Virus cap1 2'-O-Methyltransferase Activity Impairs Recognition by RIG-I

Viruses have evolved numerous mechanisms that allow capping and methylation of viral RNA in the cytosol. Flaviviruses (positive ssRNA) express the NS5 protein, which performs RNA polymerization as well as guanine N<sub>7</sub> and ribose 2'-O-methylations (Figure S4; Zhou et al., 2007). To examine whether cytosolic RNA viruses use N<sub>1</sub>-2'-O-methylation to suppress type I IFN induction by RIG-I, we constructed a yellow fever virus replicon (YFVR-WT) and abrogated 2'-O-methylation activity of NS5 by mutation of NS5-E218 to A (YFVR-E218A) (Zhou et al., 2007); replication was monitored by *renilla* luciferase activity encoded by YFVR (Figure S4B). YFVR-E218A (no cap1 methylation of RNA) replication was strongly impaired in A549 cells as compared to the YFVR-WT (Figure 4A, WT versus 218). By

### Figure 2. Immune Tolerance of 2'-O-Methylated cap1 Structures Is Mediated by H830 in the ppp-dsRNA Binding Cleft of RIG-I

(A) Wild-type or indicated full-length human RIG-I mutants (see also Figure S1) were overexpressed for 12 hr in HEK293<sup>blue</sup> cells and stimulated with 5 nM synthetic 5'-ppp-ss or dsRNA. IP10 production was analyzed 20 hr after stimulation. Data from three independent experiments are depicted as mean values  $\pm$  SEM.

(B) Immunoblot of RIG-I(WT) and indicated RIG-I mutants overexpressed in HEK293<sup>blue</sup> cells for 48 hr.

(C) Interaction of H830 with 2'-OH of N<sub>1</sub> as revealed from crystal structure (Wang et al., 2010) of CTD-ppp-dsRNA complex is displayed.

(D) RIG-I(WT) or RIG-I(H830A) was overexpressed in HEK293<sup>blue</sup> cells and stimulated with indicated synthetic ppp-dsRNA ligands (5 nM). IP10 production was analyzed 20 hr after stimulation. Data from three independent experiments are depicted as mean values  $\pm$  SEM, normalized on RIG-I(WT)+pppGA (100% = 9 ng/ml IP10 in average).

(E–G) Homogenous interaction assay (AlphaScreen) of purified RIG-I(WT) or RIG-I(H830A) protein with indicated synthetic ligands. Protein concentrations were kept constant, and ligand concentrations were titrated. Titration plots (E and F) and apparent dissociation constants ( $K_d$  in G) are shown. AlphaScreen units are proportional to RIG-I-ligand complex concentrations. One representative experiment of two is shown.

Error bars indicate SD. Purity of RIG-I(WT) and RIG-I(H830A) proteins are shown in Figure S2F.

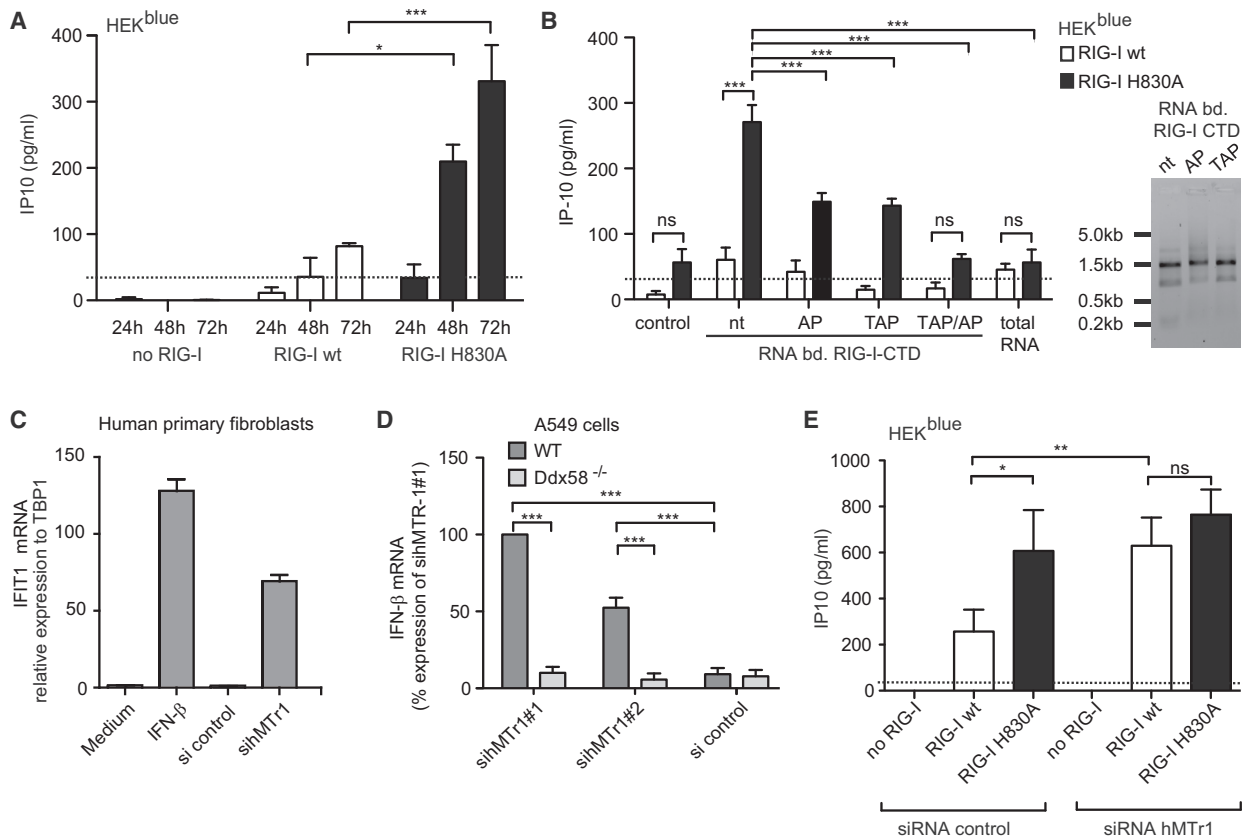

### Figure 3. H830 and cap1 2'O-Methylation of RNA Prevent Recognition of Endogenous RNAs

(A) RIG-I(WT) and RIG-I(H830A) were expressed in HEK293<sup>blue</sup> cells in the absence of exogenous RIG-I stimuli and IP10 was monitored at indicated times (24, 48, 72 hr) after transfection. Data from three independent experiments with technical duplicates are depicted as mean values + SEM.

(B) Flag-tagged RIG-I-CTD was overexpressed in HEK293<sup>blue</sup> cells. Endogenous RNA binding to immune-precipitated RIG-I-CTD was extracted and used for stimulation of RIG-I(WT)- and RIG-I(H830A)-expressing HEK293<sup>blue</sup> cells. Before stimulation, RNAs were treated with tobacco acid pyrophosphatase (TAP) or alkaline phosphatase (AP) or left untreated (nt). IP10 induction values 20 hr after stimulation from three independent experiments with technical duplicates are depicted as mean values + SEM. TAP hydrolyzes and inactivates free and capped, AP-only free triphosphate (ppp). Right panel: Ethidium bromide-stained agarose gel of RIG-I(WT)-CTD-bound RNAs. Untreated (nt), treated with TAP, or AP.

(C) Fibroblasts isolated from human nasal conchas were transfected with control siRNA (control siRNA pool) or siRNA against hMTR1 (siRNA hMTR1 pool) and harvested after 70 hr. RNA was isolated and IFN-β mRNA induction relative to TBP-1 mRNA expression was determined by real-time PCR. One representative of two experiments in triplicates is shown. Error bars indicate SD.

(D) IFN-β mRNA induction by siRNAs against hMTR1 in wild-type (WT) or RIG-I-deficient (*Ddx58*<sup>-/-</sup>) A549 cells were treated with indicated siRNAs, primed with 1,000 U/ml IFN-α, and assessed for IFN-β mRNA induction by qPCR 72 hr after siRNA transfection. Data from three independent experiments with technical duplicates are depicted as mean values + SEM.

(E) IP10 induction in RIG-I(WT)- or RIG-I(H830A)-expressing HEK293<sup>blue</sup> cells 72 hr after treatment with control siRNA (control siRNA pool) or siRNA against hMTR1 (siRNA hMTR1 pool); linear range limit, 31 pg/ml.

Data from three independent experiments with technical duplicates are depicted as mean values ± SEM (B, D, E). For statistics, two-way ANOVA and Bonferroni post-test was applied: \*p < 0.05, \*\*p < 0.01, \*\*\*p < 0.001. Knockdown efficiencies were determined by immunoblot (Figure S3A) of hMTR1 and real-time PCR (Figures S3B and S3C).

contrast, no difference in replication of both YFV replicons was found in Vero cells, which lack type I IFN genes (Figure 4B, WT versus 218). Likewise, when A549 or Vero cells were infected with whole yellow fever virus particles (Figures 4C and 4D), the NS5-E218A mutation impaired virus production in A549 cells to a much higher extent (>60-fold reduction, Figure 4C) than in Vero cells (<5-fold reduction, Figure 4D). These data indicate that cap1 methylation is involved in the immune escape of yellow fever virus from a type I IFN-dependent host restriction system. To further strengthen this hypothesis, we used RIG-I-deficient and STAT1-deficient A549 cells to assess the influence on YFV

replication (Figure 4E). Intriguingly, YFV-E218A reached the same virus titer in RIG-I-deficient A549 cells as the wild-type virus. Similar to Vero cells, the replication of YFV-E218A was not impaired in STAT1-deficient A549 cells. Viral replication was reflected by induction of the type I IFN response (Figure 4F). As determined 8 hr after infection, YFV-E218A induced a 4-fold higher IFIT1 expression than wild-type YFV. By contrast, no considerable induction of IFIT1 was detected in RIG-I- and STAT1-deficient A549 cells. The data demonstrate that RIG-I is essential for type I IFN induction by YFV in A549 cells. Furthermore, these data clearly show that the ability of YFV to methylate

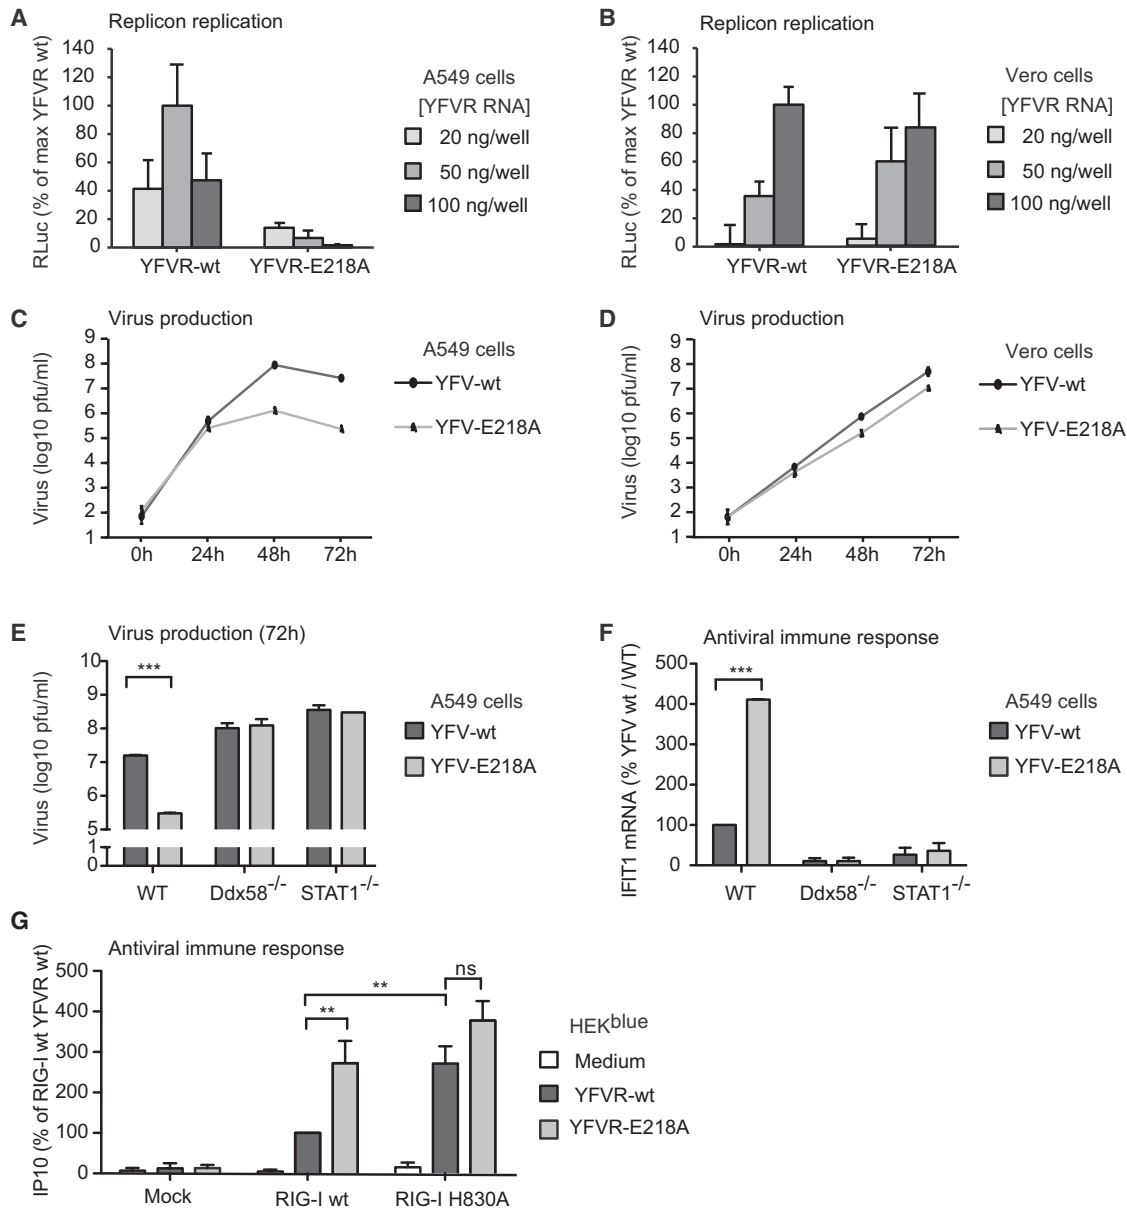

#### Figure 4. YFV cap1 2'O-Methyltransferase Prevents Immune Recognition

(A and B) Immune-competent A549 cells (A) or type I IFN gene-deficient Vero cells (B) were transfected with YFV replicon (YFVR) RNA or YFVR-E218A RNA-deficient for viral cap1 2'O-methyltransferase activity (see also Figure S4A). Replication was monitored by replicon-derived luciferase activity. Average of two experiments in technical duplicates is shown. Error bars indicate SD.

(C and D) A549 cells (C) or Vero cells (D) were infected with whole yellow fever virus particles YFV-WT or YFV-E218A (MOI 0.01). Virus production was quantified by plaque assay in BHK cells 24, 48, or 72 hr after infection. One representative of two experiments in technical duplicates is shown. Error bars indicate range.

(E) Wild-type, RIG-I-deficient (*Ddx58*<sup>-/-</sup>), or STAT1-deficient A549 cells were infected with YFV-WT or YFV-E218A (MOI 0.01) and virus production was quantified as in (C) 72 hr after infection.

(F) Wild-type, RIG-I-deficient (*Ddx58*<sup>-/-</sup>), or STAT1-deficient A549 cells were infected with YFV-WT or YFV-E218A (MOI 1) and IFIT1 mRNA was measured 8 hr after infection by RT-PCR.

(E and F) Average values of two experiments in technical duplicates are shown; error bars indicate SEM.

(G) Untransfected (no RIG-I, mock), RIG-I(WT)-, or RIG-I(H830A)-expressing HEK293<sup>blue</sup> cells were transfected with YFVR-WT or YFVR(218) replicon RNA. The mean values of four experiments in technical duplicates is shown, error bars: SEM 100% = 895 ng/ml IP10 in average, linear range limit: 31 pg/ml.

(E-G) For statistics, two-way ANOVA and Bonferroni post-test were applied: \*\*p < 0.01, \*\*\*p < 0.001.

RNA (lost with the mutation E218A) reduces immunorecognition of the virus by RIG-I and enhances viral replication. In HEK293<sup>blue</sup> cells lacking endogenous RIG-I expression, YFVR-

WT and YFVR-E218A induced IP10 only when RIG-I was expressed (Figure 4G). Analogous to cells with reduced endogenous MTR1 (Figure 3E), YFVR-E218A lacking the viral

$N_1$ -2'-O-methyltransferase activity induced a 3-fold higher IP10 level than YFVR-WT in RIG-I(WT)-expressing cells (Figure 4G, RIG-I WT blue versus orange). On the other hand, RIG-I(H830A), ignoring 2'-O-methylation status, induced equal amounts of IP10 in response to YFVR-WT and YFVR-E218A (Figure 4G), up to the same level as the response to YFVR-E218A RNA in RIG-I(WT) transfected cells.

Altogether these results demonstrated that cap1 2'-O-methylation of YFV RNA constitutes a viral subversion mechanism to evade RIG-I recognition.

## DISCUSSION

Posttranscriptional modification is key for the discrimination of foreign from self nucleic acids. Using synthetic modified pppRNA, we analyzed the influence of individual cap modifications including  $N_7$  methylation and 2'-O-methylation. We found that masking the 5' RNA triphosphate by the non-methylated  $^0G$ -cap alone did not influence RIG-I stimulation. Additional  $N_7$ -methylation of  $^0GpppNN$ -RNA, resulting in a cap0 structure ( $^{m7}GpppNN$ -RNA), reduced RIG-I activation, but only partially. By contrast, 2'-O-methylation at the penultimate nucleotide ( $N_1$ ) as found in vertebrate mRNA cap1 structures ( $^{m7}GpppN_mN$ -RNA) abrogated RIG-I activation completely.

Because not only viral RNA but also abundant cytosolic self-RNA molecules harbor a triphosphate at the 5' end, the distinction of self from viral RNA is molecularly challenging. The detection system needs to provide high sensitivity for few viral RNA copies and immune tolerance toward highly abundant endogenous RNA species. Based on our previous structural data (Wang et al., 2010), we are now able to provide for the first time the molecular mechanism of how an innate immune receptor discriminates 2'-O-methylation of self RNA, as the RIG-I RNA binding pocket prevents binding of  $N_1$ -2'-O-methylated RNA.

We found that sufficient self-tolerance necessitates several levels of self-RNA labeling and that methylations are the decisive modifications to prohibit recognition by RIG-I. By using chemically synthesized RNA, we are now able to dissect single modifications independently and quantify their contributions. Non-methylated  $^0G$  cap alone did not affect RIG-I stimulation. This is in accordance with the ppp-dsRNA/RIG-I crystal structure (Lu et al., 2010; Wang et al., 2010) from which it can be predicted that a  $^0G$  cap does not sterically interfere with binding to RIG-I. By contrast,  $N_7$ -methylation ( $^{m7}G$  cap) impaired RIG-I stimulation at low ligand concentrations but not to a full extent. In previous studies, we found a higher inhibitory impact of the methylguanidine ( $^{m7}G$ ) cap0 structure, which can be explained by the *in vitro* transcription process used to generate these ligands (Hornung et al., 2006; Pichlmair et al., 2006) (see Supplemental Experimental Procedures for details). Additional  $N_7$ -methylation introduces a positive charge into the cap, which weakens the interaction with the basic (positively charged) pppRNA-binding cleft. Furthermore,  $^{m7}G$  mediates binding to eIF4A (Fechter and Brownlee, 2005), potentially competing with binding to RIG-I. Both effects can reduce RIG-I activation but are not sufficient to mediate the complete ignorance of self 5'-triphosphate RNA by RIG-I. Our data show that complete self-tolerance is accomplished by a single 2'-O-methyl group at the 5'-terminal residue ( $N_1$ ), a characteristic molecular feature

of higher eukaryotes' mRNA (Banerjee, 1980). This immune tolerance is mediated by a single highly conserved amino acid, H830, in the pppRNA-binding domain of RIG-I. The responsible histidine is present in all known species that express RIG-I and was therefore deemed to be involved in RNA binding (Lu et al., 2010; Wang et al., 2010). Mutation of H830 to alanine restored the binding of and stimulation by 2'-O-methyl pppRNA while the stimulatory activity of non-methyl pppRNA remained unaffected, highlighting an exclusive immune regulatory function of H830.  $N_1$ -2'-O-methylated and non-methylated ppp-dsRNAs or  $^{m7}Gppp$ -dsRNA bind with considerably different affinities to wild-type RIG-I but with similar affinities to mutant RIG-I(H830A), indicating a direct steric effect of H830 on  $N_1$ -2'-O-methylated RNA. An inactive ligand (pppG<sub>m</sub>A) still showed residual but non-productive RIG-I binding. The discrepancy between binding (only 5-fold reduction) and biological activity (no RIG-I activation at any concentration) might appear contradictory at first view. However, an assay that simply measures binding affinity can resolve neither the site nor the orientation of protein/ligand interaction. Previously, non-productive binding to RIG-I of dsRNA with competitive, ppp(+1nt)-dsRNA, and non-competitive, blunt OH-dsRNA, ligands has been reported (Marq et al., 2011). Our competition assay revealed that  $N_1$ -2'-O-methylated dsRNA is a much weaker competitive inhibitor than ppp(+1nt)-dsRNA (if at all) for pppGA binding. Thus, pppG<sub>m</sub>A has a similar profile to the blunt OH-dsRNA sequences used by Marq et al. (2011). These sequences can bind RIG-I but are nonetheless incapable of inhibiting pppGA binding or inducing type I IFN. In retrospect, because both blunt OH-dsRNA and pppG<sub>m</sub>A cannot properly interact with the lysine-rich binding cleft, the similarities observed between these two classes of dsRNA are completely in line with our other data. Although we demonstrate that pppG<sub>m</sub>A is sterically hindered by H830, OH-dsRNA clearly lacks the phosphates requisite for binding-cleft interaction. By contrast, ppp(+1nt)-dsRNA should be able to interact with the designated binding cleft (K888, K858, K861, H830, K907), and it could be that this is essential to its ability to act as a competitive, non-productive ligand. Nonetheless, from our data we cannot conclude whether the detected pppG<sub>m</sub>A/RIG-I interaction results from an inaccurate binding as a result from a distorted helix orientation within the binding cleft or whether interaction is mediated by other, unspecific contacts. Whatever the nature of this interaction, it does not succeed in RIG-I activation.

In addition, it must be emphasized that the *in vivo*  $N_1$ -methylation of mRNA does not occur in an isolated fashion without  $^{m7}G$ -capping. In fact, MTr1 requires  $^{m7}G$ -capped RNA as a substrate. Moreover, in this physiological situation, these two modifications are strongly synergistic.  $^{m7}G$ -capping mediates a reduction in type I IFN induction for RIG-I(WT) and RIG-I(H830A) alike, and additional  $N_1$ -methylation of  $^{m7}G$ -capped dsRNA ( $^{m7}GpppG_mA$ ) completely abrogates the interaction with RIG-I(WT). Thus, *in vivo*, it is MTr1-mediated  $N_1$ -methylation that renders endogenous mRNA completely immunologically inert.

Because RIG-I is exclusively stimulated by base-paired pppRNA ends (Schlee et al., 2009), the existence of endogenous RIG-I ligands is not self-evident. Although we did not identify the RNA species responsible for RIG-I activation, our results demonstrate that endogenous RNA species exist, which can be detected in the absence of  $N_1$ -2'-O-methylation or the RIG-I H830



side chain. Phosphatase treatment of endogenous RNA revealed that in the cell both capped and uncapped RNA molecules exist that stimulate mutant RIG-I(H830A). Base-paired RNA structures can be a result of intra- or intermolecular base pairing or could be formed by a recently described endogenous RNA replication mechanism (Kapranov et al., 2010). The fact that stimulation of RIG-I(H830A) by endogenous RNA was relatively weak indicates that the concentration of stimulatory RIG-I ligands is either low or that endogenous RIG-I ligands present a suboptimal ligand structure. However, its long-term immune stimulatory effects could lead to severe autoinflammatory effects *in vivo*.

Our results on the YFV-encoded 2′O-methyltransferase demonstrate that viruses employ 2′O-methylation of N<sub>1</sub> to escape recognition by RIG-I: the 2′O-methyltransferase deletion mutant YFVR-E218A of the viral replicon led to decrease of replication in A549 cells but not in Vero cells, which are known to have deleted IFN genes. Accordingly, the replication of the mutated virus YFV-E218A was strongly impaired in A549 cells but not in Vero- or STAT1-deficient A549 cells, which have a defect in type I IFN signaling. Intriguingly, viral titers of YFV-E218A and YFV-WT were equal in RIG-I-deficient A549 cells. IFIT1 mRNA (as an indicator of type I IFN induction) was induced more strongly by YFV-E218A than YFV-WT. Of note, no IFIT1 induction by YFV-WT or YFV-E218A occurred in absence of RIG-I in A549 cells.

Analogous to our YFV 2′O-methyltransferase mutant YFV-E218A, Daffis et al. (2010) analyzed the flavivirus WNV including a mutant lacking 2′O-methyltransferase activity (WNV-E218A). They showed that the type I IFN-induced protein IFIT1 mediates repression of WNV-E218A replication in the brain (*in vivo*) and in macrophages *in vitro* (Daffis et al., 2010). As revealed by their experiments, the type I IFN-induced IFIT1 protein could act only downstream of MAVS-dependent type I IFN-inducing pathways, which in turn requires prior detection of the viral RNA via either RIG-I or MDA5 (Daffis et al., 2010). In a follow-up study, the same group observed that *lfit1*<sup>-/-</sup> mice still survive subcutaneous WNV-E218A infection at a viral titer that is lethal for wild-type WNV (Szretter et al., 2012), suggesting 2′O-methylation-sensitive immune mechanisms beyond IFIT1. Altogether, this is in line with our results that RIG-I is a 2′O-methylation-sensitive receptor of viral RNA and that IFIT1 expression is induced by RIG-I and therefore cannot act without prior upregulation by type I IFN-inducing receptors like RIG-I.

Züst et al. (2011) observed that a mutant of the (+)ssRNA coronavirus MHV lacking viral N<sub>1</sub>-2′O-methyltransferase activity showed enhanced IFN-β induction and suppressed virus replication in murine macrophages and that both effects were MDA5 dependent. However, MDA5 deficiency neither led to restoration of WNV-E218A infectivity in primary cells nor rescued WNV-E218A virulence in mice (Szretter et al., 2012). In addition, a viral mRNA has been identified, which stimulated MDA5, when expressed under the control of an RNA polymerase-II-controlled promoter that produces N<sub>1</sub>-2′O-methylated mRNA (cap1 structure) (Luthra et al., 2011), which suggests that N<sub>1</sub>-2′O-methylation does not generally impair MDA5 engagement. None of the above studies examined RIG-I-deficient cells. In the light of our results and the above mentioned data (Daffis et al., 2010; Szretter et al., 2012), we conclude that IFIT1 acts as type I IFN-

induced effector downstream of type I IFN-inducing receptors (e.g., RIG-I and MDA5) to sequester viral mRNA from translation (Habjan et al., 2013). Because no direct impact of N<sub>1</sub>-2′O-methylation on binding of viral RNA to MDA5 was shown, still an indirect effect remains possible. Because coronavirus recognition in murine macrophages is known to require MDA5 (Roth-Cross et al., 2008), it is conceivable that stimulation via MDA5 is required for type I IFN-dependent upregulation of IFIT1, which then sequesters non-2′O-methyl RNA, thereby inhibiting translation of viral proteins, which suppress recognition of RNA or interfere with type I IFN-inducing pathways. In this study, we provide molecular evidence for a direct physical interaction of RIG-I and RNA, which is sterically impaired by 2′O-methyl at the N<sub>1</sub> position, leading to abolishment of RIG-I activation.

In conclusion, with this study we identified the highly conserved biological function of the N<sub>1</sub>-2′O-methylation of capped RNA, and we resolved the molecular mechanism that allows the distinction of self versus foreign RNA by RIG-I. We provide evidence that endogenous stimulatory RNA molecules exist at sufficient numbers to allow RIG-I activation and that the proper function of the endogenous 2′O-methyltransferase prevents RIG-I-driven autoinflammation; furthermore, that viruses mimic the molecular mechanism of self-tolerance by introducing a viral 2′O-methyltransferase. To our knowledge, RIG-I is the first example of an innate immune receptor that adapted its structure to tolerate self-RNA (that is actively labeled self in the nucleus) rather than adapting its structure to detect a specific foreign molecule. Thus, like the adaptive immune system, innate immunity employs active mechanisms that secure tolerance toward self while potently responding to foreign molecular pattern. Our study emphasizes endogenous RNA methyltransferases (N<sub>7</sub> and N<sub>1,2</sub>-2′O-methyltransferases) as the crucial safeguards for maintenance of immune tolerance of self-RNA.

## EXPERIMENTAL PROCEDURES

### Preparation of Capped RNA

Triphosphorylated RNA oligonucleotides were chemically synthesized as described (Goldeck et al., 2014). Internal methylation occurred by incorporation of methylated nucleotides during chemical synthesis. Capping (addition of 5′ <sup>7m</sup>G) occurred by incubation of pppRNA with vaccinia virus capping enzyme (Epicenter), GTP, and S-Adenosyl methionine (SAM) according to the manufacturers' protocol (Figure S2). Preparation of "GpppGA" occurred in absence of SAM. Uncapped pppRNA was eliminated by treatment with 5′-polyphosphatase (Epicenter) and Terminator Nuclease (Epicenter) (Figure S2). Polyacrylamide gel electrophoresis (PAGE) and MALDI-ToF mass spectrometry (Metabion) was performed as described (Figure S2; Schlee et al., 2009).

### Cell Culture

Human PBMCs were isolated as described (Schlee et al., 2009). For stimulation, 4 × 10<sup>6</sup> cells (PBMCs) were cultured in 96-well plates. The PBMC studies were approved by the local ethics committee (Ethikkommission der Medizinischen Fakultät Bonn) according to the ICH-GCP guidelines. Written informed consent was provided by voluntary blood donors.

To inhibit TLR7/8 activity, cells were pre-incubated with 2.5 μg/ml chloroquine for 30 min. Cells were kept in RPMI 1640 (10% FCS, 1.5 mM L-Glu, 100 U/ml penicillin, 100 μg/ml streptomycin). For transfection, nucleic acids were complexed with Lipofectamine(LF) 2000 (Life Technologies). HEK293<sup>bluc</sup> cells (InvivoGen) are reporter cells for type 1 IFN. By incident, as demonstrated (Figures 2A and 2D), they show negligible RIG-I background activity. Murine BM-DCs were generated by culturing murine bone marrow cells for 7 days with GM-CSF.

### Detection of Cytokines

IFN- $\alpha$  and IP10 levels were analyzed with commercial ELISA assay kits. In our hands the linear range limit for the IP-10 ELISA (BD Biosciences) was 31 pg/ml and for the IFN- $\alpha$  ELISA (eBioscience) was 8 pg/ml.

### Generation of RIG-I Mutants

Mutagenesis of full-length RIG-I was performed as described (Wang et al., 2010). (Primers listed in Table S1.) Constructs were confirmed by sequencing. Equal protein expression of RIG-I mutants was confirmed by immunoblot with an antibody against Flag (Sigma) (Figure 2B).

### Protein Purification and Analysis

(His)<sub>6</sub>-Flag-tagged RIG-I(WT) and RIG-I(H830A) were transiently overexpressed in HEK293<sup>blue</sup> cells and lysed in a CHAPS-containing lysis buffer (150 mM NaCl, 50 mM Tris/HCl [pH 7.4], 2 mM MgCl<sub>2</sub>, 1 mM DTT, 1% CHAPS) including protease inhibitor cocktail (Roche). The lysate was incubated overnight at 4°C with anti-FLAG beads (Sigma). Anti-FLAG beads were washed subsequently with lysis buffer and high salt wash buffer (300 mM NaCl, 50 mM Tris/HCl [pH 7.4], 5 mM MgCl<sub>2</sub>, 1 mM DTT, 0.1% CHAPS). RIG-I-FLAG was eluted by addition of FLAG-peptide (300  $\mu$ g/ml) solution to the beads. The purity and concentration of recombinant RIG-I-derivates was determined by SDS-PAGE/Coomassie blue stain.

### Alpha Screen RIG-I-Binding Assay

The binding affinity of RNA for (His)<sub>6</sub>-FLAG-tagged RIG-I and RIG-I(H830A) was determined by an amplified luminescent proximity homogenous assay (AlphaScreen; Perkin Elmer). In this assay purified HF-RIG-I was incubated with concentrations of biotinylated RNA for 1 hr at 37°C in buffer (50 mM KCl, 5 mM HEPES [pH 7.0], 3 mM MgCl<sub>2</sub>, 0.5 mM DTT, 0.01% Tween, 1% BSA) and subsequently incubated for 30 min at 25°C with HF-RIG-I-binding Nickel Chelate acceptor beads (Perkin-Elmer) and biotin-RNA-binding Streptavidin donor beads (Perkin Elmer).

### Pull-Down of Endogenous RNA by RIG-I-CTD

For the affinity purification of endogenous RNA, a RNA pull-down was conducted using the RNA-binding domain CTD. A RIG-I-CTD expression plasmid containing a (His)<sub>6</sub>-Flag-Tag was generated via PCR cloning. RIG-I-CTD was transiently overexpressed in HEK293<sup>blue</sup> cells and lysed concordant to the protein purification protocol (see above). The lysate was incubated 2 hr at 4°C with anti-FLAG beads (Sigma). The beads were washed stringently with lysis buffer. Trizol/chloroform extraction of the bound RNA from the RIG-I-CTD and treatment with alkaline phosphatase (AP; Fermentas) and tobacco acid pyrophosphatase (TAP; Epicenter) was conducted according to manufacturers' instructions.

### siRNA-Mediated Knockdown Experiments

For RNAi/RIG-I mutant experiments, 15  $\times$  10<sup>3</sup> HEK293<sup>blue</sup> cells were seeded per well (96-well format) and 50 ng RIG-I expression plasmid (WT or H830A) per well was transfected with Genejuice (Merck). After 12 hr, 100 nM siRNA against sihMTr1 or control (siGenome SMART pool, Dharmacon) was transfected with LF2000. WT or *Ddx58*<sup>-/-</sup> A549 cells were seeded at 30  $\times$  10<sup>3</sup>/well (48-well format) and transfected (RNAiMAX, Life Technologies) with siRNAs against hMTr1 or luciferase (target site + 3'dTdT: siLuc: cauaagcguaugaagagauac, sihMTr1#1: gugaaggauugguuaaua, sihMTr1#2: ggaauagagcgauuggaug, Biomers). Efficient knockdown was confirmed via qPCR (Figure S3).

### Construction of Yellow Fever Virus Constructs and Quantification of Replication

The construction of YFV wild-type and NS5 E218A mutant virus and replicons (Figure S4) expressing *renilla* luciferase is described in the Supplemental Experimental Procedures. In brief, replication-competent YFVR- or YFV-RNA were generated by in vitro transcription. Replication of YFV-replicons was monitored by *renilla*-Luciferase assay 24 hr after transfection. Virus was generated by electroporation of BHK-J cells with YFV-RNA. Virus titers were determined by BHK-J cell plaque assays as described (Kümmerer and Rice, 2002).

### Generation of Knockout Cell Lines

A549 cells were transfected with LF2000 with 200 ng of a CAS9-gRNA expression plasmid targeting RIG-I (5'-GGGTCTCCGGATATAATCC(TGG)-3') or

STAT1 (5'-CAGGAGGTCATGAAAACGGA(TGG)-3'). Knockout clones were confirmed by functional testing, immunoblot, and Sanger sequencing.

### SUPPLEMENTAL INFORMATION

Supplemental Information includes four figures, one table, and Supplemental Experimental Procedures and can be found with this article online at <http://dx.doi.org/10.1016/j.immuni.2015.06.015>.

### AUTHOR CONTRIBUTIONS

Conceptualization, M.S., J.L., T.Z., C.S.-W., A.K.B., V.H., and G.H.; Methodology, M.S., C.S.-W., A.K.B., B.M.K., R.K., S.W., T.Z., J.L., M.G., A.-M.H., T.S., J.L.S.-B., J.-P.S., and A.R.; Formal Analysis, A.-M.H., A.K.B., M.S., and C.S.-W.; Investigation, M.S., C.S.-W., A.K.B., A.-M.H., T.Z., M.G., B.M.K., and S.W.; Writing – Original Draft, M.S., C.S.-W., V.H., E.B., A.K.B., and G.H.; Writing – Review & Editing, E.B., M.S., V.H., J.L., W.B., A.K.B., C.C., C.D., and G.H.; Funding Acquisition, M.S., G.H., V.H., W.B., C.C., E.B., C.D., B.M.K.; Resources, J.L., M.G., T.S., J.L.S.-B., J.-P.S., A.R., B.M.K., R.K., and C.C.; Supervision, M.S., J.L., B.M.K., C.D., C.C., W.B., V.H., and G.H.

### ACKNOWLEDGMENTS

We thank Janett Wieseler for excellent technical assistance and Cristina A. Hagmann and Jasper v.d. Boorn for critically reading the manuscript. We are also thankful to Charles M. Rice for providing pACNR/YF 17D. B.M.K., C.C., G.H., M.S., V.H., and W.B. are supported by the Deutsche Forschungsgemeinschaft (<http://www.dfg.de>; SFB670 to M.S., G.H., V.H., and W.B., DFG SCHL1930/1-1 to M.S., SFB704 to G.H. and W.B., SFB832 and KFO177 to G.H. and C.C., and KU1201/4-1 to B.M.K.). E.B. is supported by the University Hospital of Bonn (BONFOR). A.K.B., E.B., G.H., M.S., V.H., and W.B. are supported by the DFG Excellence Cluster ImmunoSensation. C.D., G.H., V.H., and W.B. are supported by the German Center of Infectious Disease (DZIF). The funders had no role in study design, data collection and analysis, decision to publish, or preparation of the manuscript. C.S.-W., G.H., and V.H. are co-founders and shareholders of the Rigotec GmbH.

Received: March 28, 2013

Revised: January 19, 2015

Accepted: May 1, 2015

Published: July 14, 2015

### REFERENCES

- Abbas, Y.M., Pichlmair, A., Góna, M.W., Superti-Furga, G., and Nagar, B. (2013). Structural basis for viral 5'-PPP-RNA recognition by human IFIT proteins. *Nature* 494, 60–64.
- Banerjee, A.K. (1980). 5'-terminal cap structure in eucaryotic messenger ribonucleic acids. *Microbiol. Rev.* 44, 175–205.
- Bélanger, F., Stepinski, J., Darzynkiewicz, E., and Pelletier, J. (2010). Characterization of hMTr1, a human Cap1 2'-O-ribose methyltransferase. *J. Biol. Chem.* 285, 33037–33044.
- Bray, M. (2008). Highly pathogenic RNA viral infections: challenges for antiviral research. *Antiviral Res.* 78, 1–8.
- Brownell, J., Bruckner, J., Wagoner, J., Thomas, E., Loo, Y.M., Gale, M., Jr., Liang, T.J., and Polyak, S.J. (2014). Direct, interferon-independent activation of the CXCL10 promoter by NF- $\kappa$ B and interferon regulatory factor 3 during hepatitis C virus infection. *J. Virol.* 88, 1582–1590.
- Civril, F., Bennett, M., Moldt, M., Deimling, T., Witte, G., Schiesser, S., Carell, T., and Hopfner, K.P. (2011). The RIG-I ATPase domain structure reveals insights into ATP-dependent antiviral signalling. *EMBO Rep.* 12, 1127–1134.
- Cui, S., Eisenächer, K., Kirchhofer, A., Brzózka, K., Lammens, A., Lammens, K., Fujita, T., Conzelmann, K.K., Krug, A., and Hopfner, K.P. (2008). The C-terminal regulatory domain is the RNA 5'-triphosphate sensor of RIG-I. *Mol. Cell* 29, 169–179.

- Daffis, S., Szretter, K.J., Schriewer, J., Li, J., Youn, S., Errett, J., Lin, T.Y., Schneller, S., Zust, R., Dong, H., et al. (2010). 2'-O methylation of the viral mRNA cap evades host restriction by IFIT family members. *Nature* **468**, 452–456.
- Fechter, P., and Brownlee, G.G. (2005). Recognition of mRNA cap structures by viral and cellular proteins. *J. Gen. Virol.* **86**, 1239–1249.
- Gitlin, L., Barchet, W., Gilfillan, S., Cella, M., Beutler, B., Flavell, R.A., Diamond, M.S., and Colonna, M. (2006). Essential role of mda-5 in type I IFN responses to polyriboinosinic:polyribocytidylic acid and encephalomyocarditis picornavirus. *Proc. Natl. Acad. Sci. USA* **103**, 8459–8464.
- Goldeck, M., Tuschl, T., Hartmann, G., and Ludwig, J. (2014). Efficient solid-phase synthesis of pppRNA by using product-specific labeling. *Angew. Chem. Int. Ed. Engl.* **53**, 4694–4698.
- Goubau, D., Schlee, M., Deddouche, S., Pruijssers, A.J., Zillinger, T., Goldeck, M., Schuberth, C., Van der Veen, A.G., Fujimura, T., Rehwinkel, J., et al. (2014). Antiviral immunity via RIG-I-mediated recognition of RNA bearing 5'-diphosphates. *Nature* **514**, 372–375.
- Habjan, M., Hubel, P., Lacerda, L., Benda, C., Holze, C., Eberl, C.H., Mann, A., Kindler, E., Gil-Cruz, C., Ziebuhr, J., et al. (2013). Sequestration by IFIT1 impairs translation of 2'-O-unmethylated capped RNA. *PLoS Pathog.* **9**, e1003663.
- Hornung, V., Ellegast, J., Kim, S., Brzózka, K., Jung, A., Kato, H., Poeck, H., Akira, S., Conzelmann, K.K., Schlee, M., et al. (2006). 5'-Triphosphate RNA is the ligand for RIG-I. *Science* **314**, 994–997.
- Jiang, F., Ramanathan, A., Miller, M.T., Tang, G.Q., Gale, M., Jr., Patel, S.S., and Marcotrigiano, J. (2011). Structural basis of RNA recognition and activation by innate immune receptor RIG-I. *Nature* **479**, 423–427.
- Kapranov, P., Ozsolak, F., Kim, S.W., Foissac, S., Lipson, D., Hart, C., Roels, S., Borel, C., Antonarakis, S.E., Monaghan, A.P., et al. (2010). New class of gene-termini-associated human RNAs suggests a novel RNA copying mechanism. *Nature* **466**, 642–646.
- Kato, H., Takeuchi, O., Sato, S., Yoneyama, M., Yamamoto, M., Matsui, K., Uematsu, S., Jung, A., Kawai, T., Ishii, K.J., et al. (2006). Differential roles of MDA5 and RIG-I helicases in the recognition of RNA viruses. *Nature* **441**, 101–105.
- Kowalinski, E., Lunardi, T., McCarthy, A.A., Loubser, J., Brunel, J., Grigorov, B., Gerlier, D., and Cusack, S. (2011). Structural basis for the activation of innate immune pattern-recognition receptor RIG-I by viral RNA. *Cell* **147**, 423–435.
- Kümmerer, B.M., and Rice, C.M. (2002). Mutations in the yellow fever virus nonstructural protein NS2A selectively block production of infectious particles. *J. Virol.* **76**, 4773–4784.
- Loo, Y.M., Fomek, J., Crochet, N., Bajwa, G., Perwitasari, O., Martinez-Sobrido, L., Akira, S., Gill, M.A., Garcia-Sastre, A., Katze, M.G., and Gale, M., Jr. (2008). Distinct RIG-I and MDA5 signaling by RNA viruses in innate immunity. *J. Virol.* **82**, 335–345.
- Lu, C., Xu, H., Ranjith-Kumar, C.T., Brooks, M.T., Hou, T.Y., Hu, F., Herr, A.B., Strong, R.K., Kao, C.C., and Li, P. (2010). The structural basis of 5' triphosphate double-stranded RNA recognition by RIG-I C-terminal domain. *Structure* **18**, 1032–1043.
- Luo, D., Ding, S.C., Vela, A., Kohlway, A., Lindenbach, B.D., and Pyle, A.M. (2011). Structural insights into RNA recognition by RIG-I. *Cell* **147**, 409–422.
- Luthra, P., Sun, D., Silverman, R.H., and He, B. (2011). Activation of IFN- $\gamma$  expression by a viral mRNA through RNase L and MDA5. *Proc. Natl. Acad. Sci. USA* **108**, 2118–2123.
- Marq, J.B., Hausmann, S., Veillard, N., Kolakofsky, D., and Garcin, D. (2011). Short double-stranded RNAs with an overhanging 5' ppp-nucleotide, as found in arenavirus genomes, act as RIG-I decoys. *J. Biol. Chem.* **286**, 6108–6116.
- Perry, R.P., and Kelley, D.E. (1976). Kinetics of formation of 5' terminal caps in mRNA. *Cell* **8**, 433–442.
- Pichlmair, A., Schulz, O., Tan, C.P., Näslund, T.I., Liljeström, P., Weber, F., and Reis e Sousa, C. (2006). RIG-I-mediated antiviral responses to single-stranded RNA bearing 5'-phosphates. *Science* **314**, 997–1001.
- Pichlmair, A., Lassnig, C., Eberle, C.A., Gónna, M.W., Baumann, C.L., Burkard, T.R., Bürckstümmer, T., Stefanovic, A., Krieger, S., Bennett, K.L., et al. (2011). IFIT1 is an antiviral protein that recognizes 5'-triphosphate RNA. *Nat. Immunol.* **12**, 624–630.
- Roth-Cross, J.K., Bender, S.J., and Weiss, S.R. (2008). Murine coronavirus mouse hepatitis virus is recognized by MDA5 and induces type I interferon in brain macrophages/microglia. *J. Virol.* **82**, 9829–9838.
- Schlee, M., and Hartmann, G. (2010). The chase for the RIG-I ligand—recent advances. *Mol. Ther.* **18**, 1254–1262.
- Schlee, M., Roth, A., Hornung, V., Hagmann, C.A., Wimmenauer, V., Barchet, W., Coch, C., Janke, M., Mihailovic, A., Wardle, G., et al. (2009). Recognition of 5' triphosphate by RIG-I helicase requires short blunt double-stranded RNA as contained in panhandle of negative-strand virus. *Immunity* **31**, 25–34.
- Schmidt, A., Schwerd, T., Hamm, W., Hellmuth, J.C., Cui, S., Wenzel, M., Hoffmann, F.S., Michallet, M.C., Besch, R., Hopfner, K.P., et al. (2009). 5'-triphosphate RNA requires base-paired structures to activate antiviral signaling via RIG-I. *Proc. Natl. Acad. Sci. USA* **106**, 12067–12072.
- Szretter, K.J., Daniels, B.P., Cho, H., Gainey, M.D., Yokoyama, W.M., Gale, M., Jr., Virgin, H.W., Klein, R.S., Sen, G.C., and Diamond, M.S. (2012). 2'-O methylation of the viral mRNA cap by West Nile virus evades ifit1-dependent and -independent mechanisms of host restriction in vivo. *PLoS Pathog.* **8**, e1002698.
- Takahasi, K., Yoneyama, M., Nishihori, T., Hirai, R., Kumeta, H., Narita, R., Gale, M., Jr., Inagaki, F., and Fujita, T. (2008). Nonself RNA-sensing mechanism of RIG-I helicase and activation of antiviral immune responses. *Mol. Cell* **29**, 428–440.
- Wang, Y., Ludwig, J., Schuberth, C., Goldeck, M., Schlee, M., Li, H., Juraneck, S., Sheng, G., Micura, R., Tuschl, T., et al. (2010). Structural and functional insights into 5'-ppp RNA pattern recognition by the innate immune receptor RIG-I. *Nat. Struct. Mol. Biol.* **17**, 781–787.
- Zhou, Y., Ray, D., Zhao, Y., Dong, H., Ren, S., Li, Z., Guo, Y., Bernard, K.A., Shi, P.Y., and Li, H. (2007). Structure and function of flavivirus NS5 methyltransferase. *J. Virol.* **81**, 3891–3903.
- Züst, R., Cervantes-Barragan, L., Habjan, M., Maier, R., Neuman, B.W., Ziebuhr, J., Szretter, K.J., Baker, S.C., Barchet, W., Diamond, M.S., et al. (2011). Ribose 2'-O-methylation provides a molecular signature for the distinction of self and non-self mRNA dependent on the RNA sensor Mda5. *Nat. Immunol.* **12**, 137–143.

Immunity

Supplemental Information

**A Conserved Histidine in the RNA Sensor RIG-I  
Controls Immune Tolerance  
to N<sub>1</sub>-2'O-Methylated Self RNA**

Christine Schuberth-Wagner, Janos Ludwig, Ann Kristin Bruder, Anna-Maria Herzner, Thomas Zillinger, Marion Goldeck, Tobias Schmidt, Jonathan L. Schmid-Burgk, Romy Kerber, Steven Wolter, Jan-Philip Stümpel, Andreas Roth, Eva Bartok, Christian Drosten, Christoph Coch, Veit Hornung, Winfried Barchet, Beate M. Kümmerer, Gunther Hartmann, and Martin Schlee

Salmon gi|254911056|  
 Zebra Fish gi|254692316|  
 Duck gi|217069801|  
 Zebra Finch gi|224089735|  
**Human gi|187952415|**  
 Macaque gi|110340386|  
 Panda gi|281341395|  
 Horse gi|194224905|  
 Pig gi|224176124|  
 Cow gi|76624102|  
 rabbit gi|291383111|  
 Mouse gi|157059804|  
 Duck-Billed Platypus gi|149413|  
 Sea anemone gi|15639345|

TE----GSYQLLCSKCKKHSCYTDDIRVLQDSHHIIVLDPTLF-SRARTEP 876  
 KQ----GSYRLLCCKCTFACSSDDLRVVQKSHHIALDRSMF-ERFTTFP 855  
 VE----GQKNLLCGKCKAYACSTDDIRIKDSHHIIVLGEAFK-ERYTTKP 848  
 VE----GKKLYCGKCKAYACSTDDIRIKGSHHIVLGNFQ-ERYTTKP 848  
**DK----ENKLLCRKCKALACYTADVVRVIEECHYTVLGDAFK-ECFVSRP 846**  
 DK----ENKLLCGKCKALVCYTADIRVIEECHYTVLGDAFK-ECFVRRP 846  
 DK----ENKLLCRKCKGFACYTADIRVVEDCHYTVVGDGDFR-KCYVSKL 849  
 DK----KNKLLCRKCKAFACYTADIRVVEECHYTVVGNFR-ECFVCRS 841  
 DK----KTKLLCKKCAFACYTADIRMVCKCHFTVVGDAFR-ERFVSKL 850  
 DK----KNKLLCGKCKTFACYTADIRVVEECHFTVVRDAFR-ECFVTKL 849  
 DK----QNKLLCAKCKALACYTSEIRMVKDSHYTVVGETFK-KCFVTRP 847  
 DK----ENKLLCGKCKNFACYTADIRVETSHYTVLGDAFK-ERFVCKP 846  
 EV----NKWLLCGKCKVLACYANDIRIVEESHHTVIGETFK-NRFVAEP 831  
 DVNQHTATARFYCRKCNFTFACEARDFRVCSGSHYVVVISPEFKRDKIELKP 575  
 . : \* \*\* : \* : . \* . : . : .

H830

Salmon gi|254911056|  
 Zebra Fish gi|254692316|  
 Duck gi|217069801|  
 Zebra Finch gi|224089735|  
**Human gi|187952415|**  
 Macaque gi|110340386|  
 Panda gi|281341395|  
 Horse gi|194224905|  
 Pig gi|224176124|  
 Cow gi|76624102|  
 rabbit gi|291383111|  
 Mouse gi|157059804|  
 Duck-Billed Platypus gi|149413|  
 Sea anemone gi|15639345|

HPKPKGFMGLVKTKKLFC---HCGLDWGIVASYLSIQNLVPLKIESFVVK 923  
 HKKPISFDNFTKKNKMLCG--DCKHDWGLIASYLTIQDLPLLKIESFVVQ 903  
 HKKPMQFDGFEEKSKMYCRNNCQHDWGITVKYLTFDNLVPIKIKSFVME 898  
 HRKPVQFDDFVKKSKMHCNTECQHDWGIIVKYKIFDNLVPIKIRSFVLE 898  
**HPKPKQFSSFEKRAKIFCARQNCSDHWGIHVYKKTFE-IPVIKIESFVVE 895**  
 HPKPKKFSNFDKREKIFCARQNCSDHWGIHMKYKTFE-IPVIKIESFVVE 895  
 HPKPKSFGYFEKTAKIFCSREDCSHDWGIHVYKKTFE-IPVIKIESFVVE 898  
 HPKPKIFGSFEKKAICYCAREDCSHDWGICVKYKTFE-IPVIKIESFVVE 890  
 HPKPKSFGNIEKRAKICYCARPDCSHDWGIYVRYKAFE-MPFKIESFVVE 899  
 HPRPKKFGSFDKKAIFCARKDCLHDWGIHMKYKTFE-IPVIKIESFVVE 898  
 HPRPKSCGDFDKIGKIFCARQDCSHDWGIRAKVNAFE-IPVIKIESFVVE 896  
 HPKPKIYDNFEKKAIFCARKQNCSDHWGIFVRYKTFE-IPVIKIESFVVE 895  
 HPKQKRYGNFEKIMKIYCKERECHHDWGIYVRYKIFE-MPIKIESFVVE 880  
 HKPKLIDGITMDTKVHCK--KCGEDWGVTAKIHGAE-WPLLKINSFVVQ 622  
 \* : : \* : \* . \* \*\* : : \* . : \* . : \* . : \* . : \* . : \*

H847

F853

K858

K861

K888

K907

Salmon gi|254911056|  
 Zebra Fish gi|254692316|  
 Duck gi|217069801|  
 Zebra Finch gi|224089735|  
**Human gi|187952415|**  
 Macaque gi|110340386|  
 Panda gi|281341395|  
 Horse gi|194224905|  
 Pig gi|224176124|  
 Cow gi|76624102|  
 rabbit gi|291383111|  
 Mouse gi|157059804|  
 Duck-Billed Platypus gi|149413|  
 Sea anemone gi|15639345|

NCVTEQQRYYRKRWDVTFMSKTFE-----LTDIADSWNPLLEDQ----- 962  
 DSVTEEQYFRKWCNVTFAIQDFD-----MKEITPQTWPLRD----- 940  
 STATGTQMDFOQKWSINSSLKNFD-----VEEMSNLYPPF----- 933  
 DVESGSDMDFQKWRNINSLKNFD-----EETCS----- 927  
**DIATGVQTLYSKWKDFHFEKIPFD-----PAEMSK----- 925**  
 DIATGVQTLYSKWKDFHFEKIPFD-----PAEMAK----- 925  
 DIATGAQKLYAKWRDFPLQKIPFD-----AAEMSK----- 928  
 DIATRVQTLYAKWRDFNFEKIPFD-----AAEMSN----- 920  
 DIATGVQTVHAKWKDFNFEKLSFD-----AAEMAGGAQDLGLQGMGNLE 943  
 DVATGAQTLYAKWKDFNFEKIPFD-----AAEMSPAQDLNLQGVGDGLE 942  
 DTVTGKQMCPSKWKDFNFEKIPFN-----PEELSE----- 926  
 DIVSGVQNRHSKWKDFHFERIQFD-----PAEMSV----- 925  
 DIFTGAQHVCSSKWKTFNFRIPFD-----AAEIST----- 910  
 IE-GGPRKLYRKWTEAALNLIKQVDDYLEVLAEEEEAGLNDLSLMDLSDDDL672  
 : \* \* . : :

**Figure S1, Related to Figure 1. Alignment of RIG-I C-terminal domain of different species.** Alignments were achieved using CLUSTAL 2.0.12 multiple sequence alignment and sorted by alignment score. Amino acids, which were found to be in contact with 3P-dsRNA are highlighted by yellow background. Numbers of amino acids in the upper line correspond to amino acid numbers of human RIG-I.



### A Synthesis of capped RNA oligonucleotides

1. pppGA
2. pppGA +GTP  $\xrightarrow{\text{Capping Enzyme}}$  GpppGA
3. pppGA +GTP+SAM  $\xrightarrow{\text{Capping Enzyme}}$  m<sup>7</sup>GpppGA
4. pppG<sub>m</sub>A +GTP+SAM  $\xrightarrow{\text{Capping Enzyme}}$  m<sup>7</sup>GpppG<sub>m</sub>A
5. pppGA<sub>m</sub> +GTP+SAM  $\xrightarrow{\text{Capping Enzyme}}$  m<sup>7</sup>GpppGA<sub>m</sub>

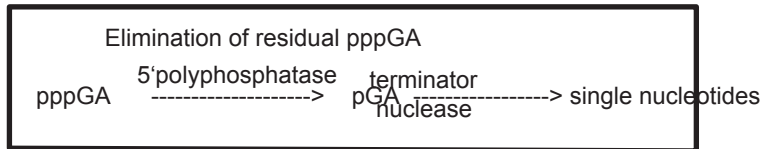

### B

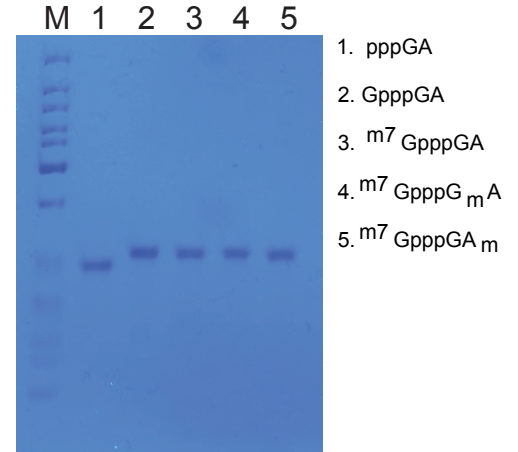

### C

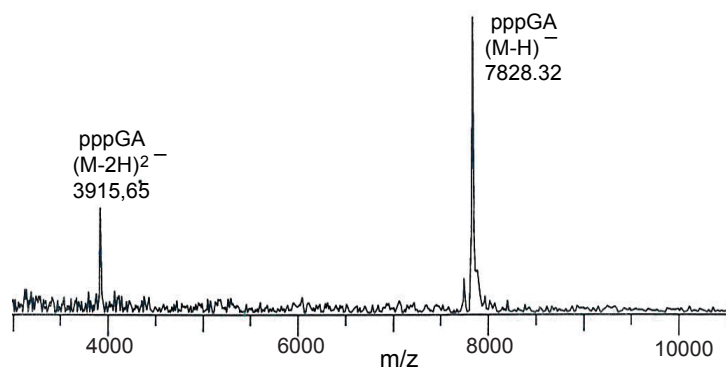

### D

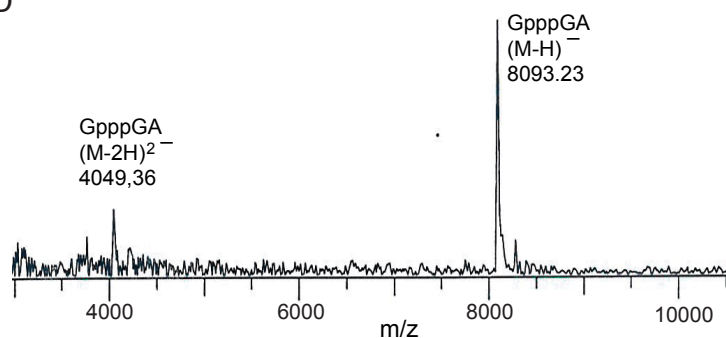

### E

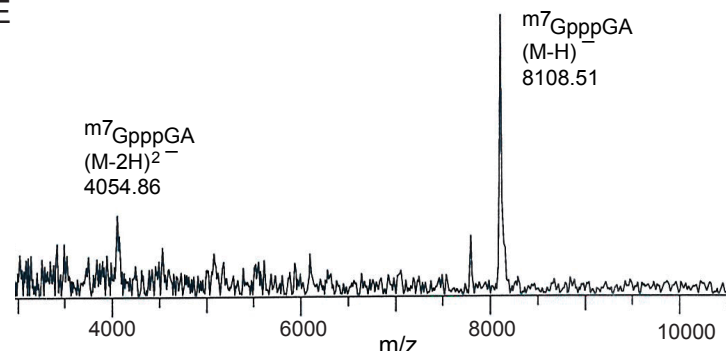

### F

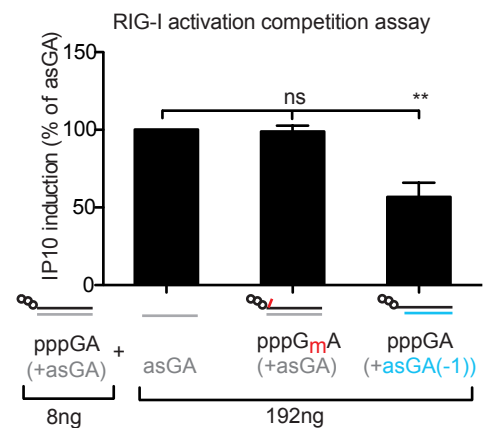

### G

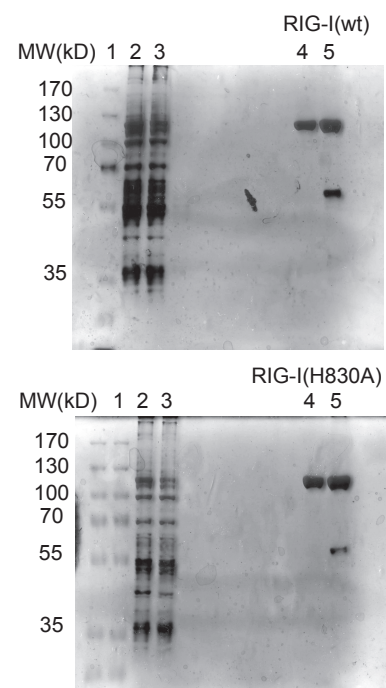

### Figure S2, Related to Figure 2. Synthesis and characterization of capped RNA and RIG-I protein

(A) Capping of synthetic triphosphorylated RNA oligonucleotides (addition of 5' 7mG) by incubation of pppRNA with vaccinia virus capping enzyme, GTP and S-Adenosyl methionine (SAM). Preparation of "GpppGA" occurred in absence of SAM. To selectively eliminate uncapped pppRNA, product mixes were subsequently treated with 5'-polyphosphatase and 5'phosphate-dependent Terminator Nuclease. (B) PAGE analysis (methylene blue staining) (C-E) MALDI-ToF mass spectrometry of indicated capped RNAs. (F) A549 cells were transfected with stimulus (8ng pppGA+asGA=pppGA(ds)) mixed with 24fold excess (192ng) of asGA (single stranded, non-binder), pppG<sub>m</sub>A+asGA (blunt, N1-2'O-methylated) and pppGA+asGA(-1) (1nt 5'ppp-overhang, non-productive binder) as indicated. IP10 secretion was monitored 24hrs after transfection. Mean of 4 independent experiments +SEM is shown (G) Silverstain RIG-I purification procedure from FLAG-RIG-I overexpressing HEK293 cells (upper: RIG-I(wt); lower RIG-I(H830A)) 1: Molecular weight ladder, 2: cell lysate, 3: beads supernatant, 4: eluate=purified RIG-I protein, 5: beads

A HEK293T + RIG-I-CTD-FLAG

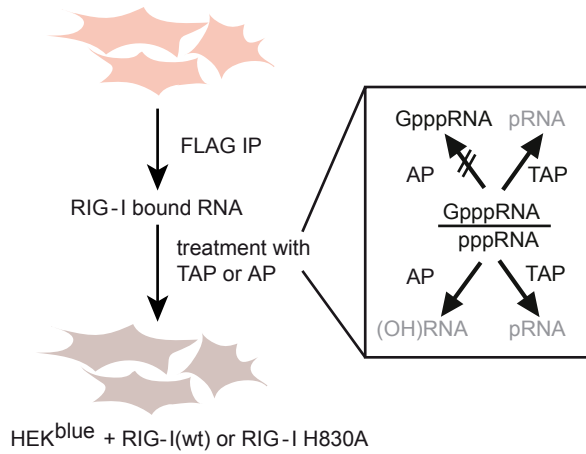

B human primary fibroblasts

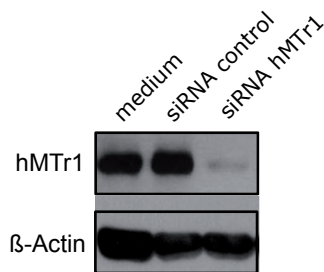

C

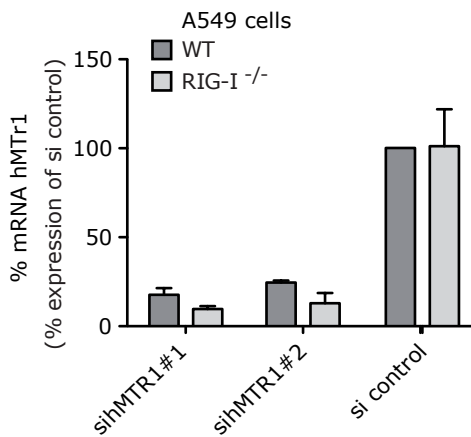

D

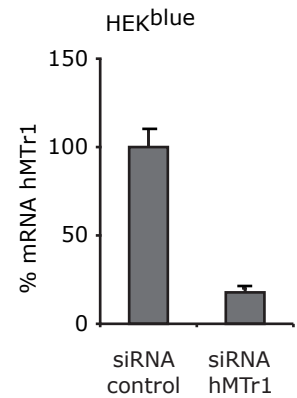

E

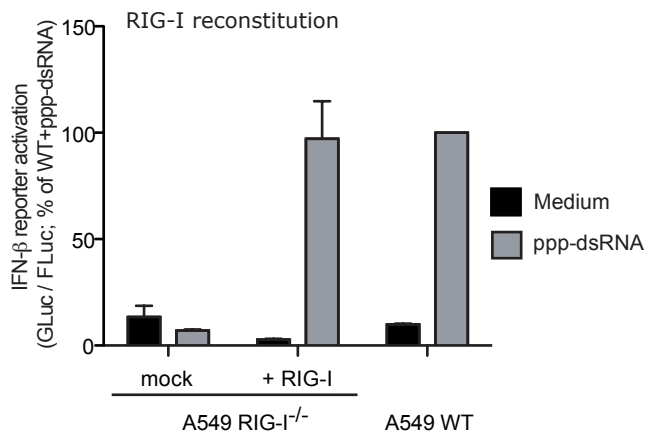

**Figure S3, Related to Figure 3. Knockdown efficiencies and RIG-I reconstitution of A549 RIG-I<sup>-/-</sup> cells**

(A) Scheme of the procedure for extraction and analysis of endogenous RIG-I ligands as performed in Fig. 3B. (B) Western blot of hMTr1 from total lysates of primary human fibroblasts of nasal concha 72hrs after transfection with control or anti-hMTr1 siRNAs. hMTr1 mRNA levels 72hrs after transfection with control or indicated hMTr1 siRNAs in WT and RIG-I deficient A549 cells (C) or HEKblue cells (D). "siRNA hMTr1" is a mix of 4 siRNAs; siMTr1#1 and siMTr1#2 are single siRNAs from the mix. (E) Wild type (WT), RIG-I deficient A549 cells (mock) or RIG-I deficient A549 cells with overexpressed RIG-I (+RIG-I) were stimulated with 20ng of ppp-dsRNA. Luciferase was monitored 24hrs after transfection. Mean of 2 independent experiments +SEM is shown.

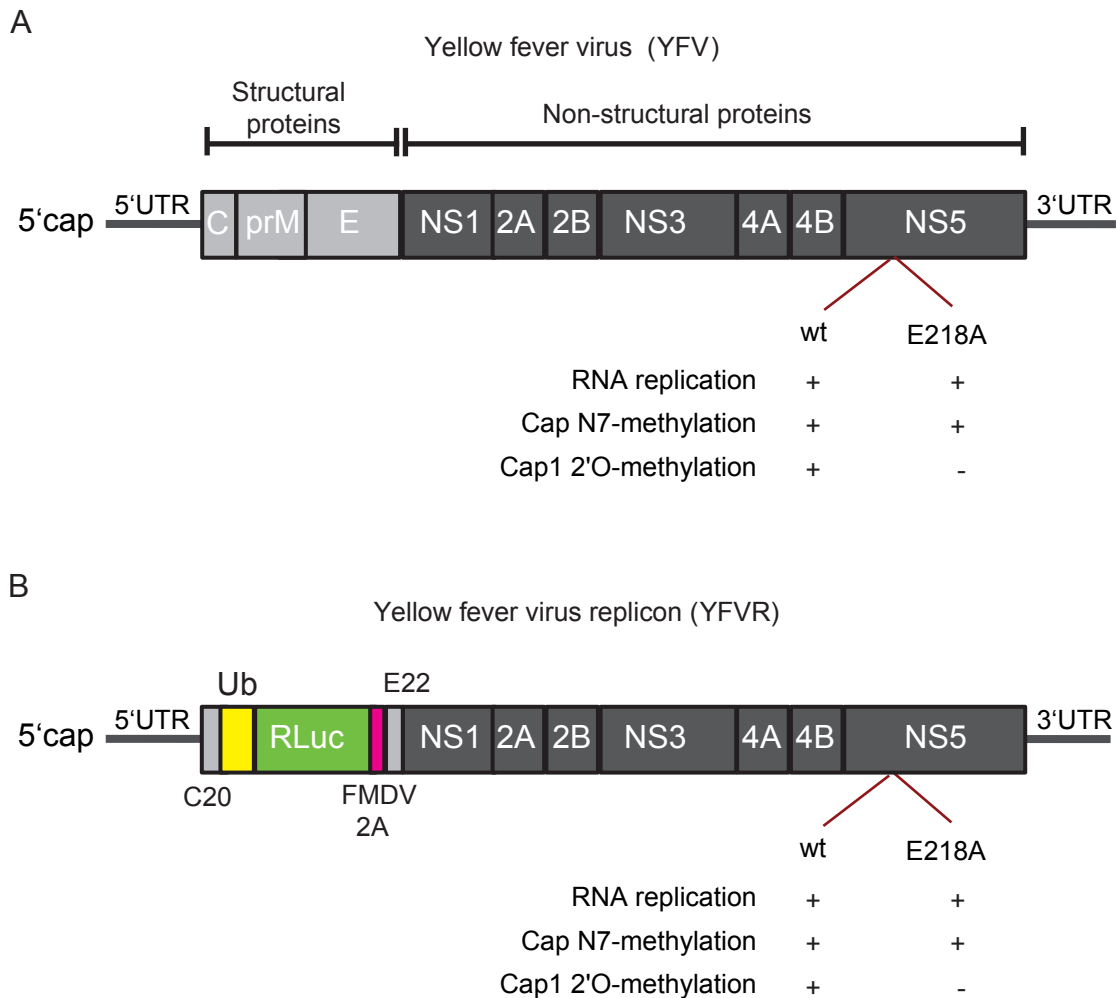

**Figure S4, Related to Figure 4. Yellow fever virus (YFV) genome and YFV derived replicons**

(A) Yellow fever virus genome: Boxes in a row denote regions coding for the structural (light gray) and non-structural (dark gray) proteins that are translated as polyprotein. The 5' UTR, which is capped during replication and the 3' UTR are also depicted. (B) Yellow fever virus replicon expressing renilla luciferase: The narrow light gray boxes represent regions remaining of the structural proteins, namely the first twenty amino acids of the capsid protein (C20) and the last 22 amino acids of the envelope protein (E22), which serve as signal sequence for the adjacent NS1 protein. The yellow box represents the ubiquitin protein (Ub) used to generate the N-terminus of the renilla luciferase protein (RLuc, green box). The narrow red box represents the 17 amino acid residue autoproteolytic peptide from the foot and mouth disease virus (FMDV 2A), which cleaves at its own C-terminus. Lines indicate 5' and 3' UTRs with the 5' UTR being capped. Features with regard to RNA replication, N7 methylation and cap1 2'O-methylation are depicted comparatively for the wild type (wt) and the E218A mutant.

| Name                               | Sequence                               | 5' end             | internal                             | Type |
|------------------------------------|----------------------------------------|--------------------|--------------------------------------|------|
| asGA                               | AAGAUGAACUUCAGGGUCAGCGUC               | OH                 | -                                    | RNA  |
| asGA(-1)                           | AAGAUGAACUUCAGGGUCAGCGU                | OH                 | -                                    | RNA  |
| asGA -bio                          | AAGAUGAACUUCAGGGUCAGCGUC               | biotin             | -                                    | RNA  |
| pppGA                              | GACGCUGACCCUGAAGUUCAUCUU               | ppp                | -                                    | RNA  |
| GpppGA                             | GACGCUGACCCUGAAGUUCAUCUU               | Gppp               | -                                    | RNA  |
| <sup>7m</sup> GpppGA               | GACGCUGACCCUGAAGUUCAUCUU               | <sup>7m</sup> Gppp | -                                    | RNA  |
| pppG <sub>m</sub> A                | G <sub>m</sub> ACGCUGACCCUGAAGUUCAUCUU | ppp                | 2'OCH <sub>3</sub> at G <sub>m</sub> | RNA  |
| <sup>7m</sup> GpppG <sub>m</sub> A | G <sub>m</sub> ACGCUGACCCUGAAGUUCAUCUU | <sup>7m</sup> Gppp | 2'OCH <sub>3</sub> at G <sub>m</sub> | RNA  |
| pppGA <sub>m</sub>                 | GA <sub>m</sub> CGCUGACCCUGAAGUUCAUCUU | ppp                | 2'OCH <sub>3</sub> at A <sub>m</sub> | RNA  |
| <sup>7m</sup> GpppGA <sub>m</sub>  | GA <sub>m</sub> CGCUGACCCUGAAGUUCAUCUU | <sup>7m</sup> Gppp | 2'OCH <sub>3</sub> at A <sub>m</sub> | RNA  |
| CTD-H830A-F                        | GCTTACACTGTGCTTGGAGATGC                | p                  | -                                    | DNA  |
| CTD-H830A-R                        | GCATTCCTCTATCACTCTTAC                  | p                  | -                                    | DNA  |
| NS5-E218A-F                        | GCAATGTACTACGTGTCTGGAGC                | p                  | -                                    | DNA  |
| NS5-E218A-R                        | ATGAGTGGAATTCCTGGAGAG                  | p                  | -                                    | DNA  |
| hMTr1-F                            | CGAAGTTCTTTGAGCTAATCCAG                | -                  | -                                    | DNA  |
| hMTr1-R                            | CAGCGGTAGTCAAACACAGG                   | -                  | -                                    | DNA  |
| IFIT1-F                            | TCCACAAGACAGAATAGCCAGAT                | -                  | -                                    | DNA  |
| IFIT1-R                            | GCTCCAGACTATCCTTGACCTG                 | -                  | -                                    | DNA  |
| IFN-beta-F                         | CATTACCTGAAGGCCAAGGA                   | -                  | -                                    | DNA  |
| IFN-beta-R                         | CAGCATCTGCTGGTTGAAGA                   | -                  | -                                    | DNA  |

**Table S1, related to Figures 1-4: Sequences and modifications of used oligonucleotides (RNA and DNA).**

Listed are names, sequences, 5'end and internal base modifications, and nucleic acid species used in the manuscript. "m" in RNA sequences indicates 2'O-methylations of the precedent nucleotide. "p": 5'monophosphate; "ppp": 5'triphosphate; "<sup>7m</sup>G": N7-methylated 5'-5' connected G; "G": Unmethylated 5'-5' connected G .

Primer sequences: F: forward, R: reverse. CTD-H830A: Primers used for RIG-I(H830A) mutation; NS5-E218A: Primers used for generation of the YFVR(E218A) mutation. HMTr1, IFIT1 and IFN-beta represent primer pairs used for quantitative real-time PCR of the indicated human gene.

## SUPPLEMENTARY EXPERIMENTAL PROCEDURES

### Construction of Yellow Fever Virus replicon constructs

For construction of the YFV replicon expressing *renilla* luciferase, the *renilla* luciferase gene was first amplified with primers BNI-339 (5'-CGGGATCCGCGGTGGCATGGCTTCCAAGGTGTACGACCCCG-3') and BNI-340 (5'-GCTCTAGACTGCTCGTTCTTCAGCACTCGCTC-3') using phRL-CMV (Promega) as a template. In addition, a fragment encompassing the sequence of the FMDV 2A protease fused to the last 22 codons of the YFV envelope protein and the NS1 sequence was amplified from pBK41 (YFVR expressing yeast HIS3, B.M. Kümmerer, unpublished data) using primers BNI-343 (5'-GCTCTAGAACTTTGATTTATTAATAATTAGCAGGAGATGTCGAAT-3') and BNI-335 (5'-GAAGATCTAGCTGTAACCCAGGAGCGCAC-3'). The resulting fragment was cut with XbaI and KpnI and fused together with the BamHI-XbaI restricted *renilla* luciferase gene into pBluescript II SK(-) (Stratagene) cut with BamHI and KpnI. A SacII-MluI fragment was released again from the resulting plasmid and cloned together with a NotI-SacII fragment from pBK41 (encompassing the YFV 5'NTR as well as the first 20 codons of the YFV capsid protein fused to an ubiquitin gene downstream of an SP6 promotor) into pACYC177/17D (Bredenbeek et al., 2003) (kindly provided by C.M. Rice, Rockefeller University, NY, NY) cut with MluI and NotI. The resulting yellow fever virus replicon expressing *renilla* luciferase was abbreviated with YFVR. Prior to mutagenesis of YFV methyltransferase, the YFV-replicon was shortened by excision of a 5,5kb fragment restriction via NotI and SpeI, blunt ends were created by T4 DNA Polymerase (Fermentas) and religated. The shortened YFV-replicon was used for whole plasmid mutagenesis PCR, which led to substitution of codon GAA (glutamic acid) at position 218 to GCA (Alanin) (Primer see Table S1). Mutagenesis PCR was followed by DpnI digestion, gel extraction and religation. Positive clones were confirmed by sequencing. The segment coding for NS5 E218A was reinserted into full-length YFV-replicon via XhoI and SphI.

### Yellow fever virus replicon constructs and quantification of replication

Replication competent YFV-RNA was generated by *in-vitro* transcription using the AmpliCap Sp6 High Yield Message Maker Kit according to manufacturers' instructions (Epicentre). The resulting RNA was purified by DNaseI digestion and Lithium-Chloride precipitation. To achieve a wild-type cap structure, the RNAs were 2'O-methylated with the vaccinia virus methyltransferase in presence of SAM according to manufacturer's instructions (Epicentre).



Uncapped RNAs were eliminated via treatment with 5'-polyphosphatase (Epicentre) and 5'-phosphate-dependent *Terminator Nuclease* (Epicentre). Replication of YFV-replicons was monitored by *renilla*-Luciferase assay. Cells were lysed via passive lysis buffer (Promega) 24h after transfection and Luciferase activity was measured by EnVision 2104 Multilabel Reader (Perkin Elmer).

### **Construction, rescue and growth kinetics of recombinant yellow fever viruses**

The pYFV-218 construct was generated by cloning the NgoMIV-XhoI fragment encoding the E218A mutation from pYFVR-218 into the full-length YF17D clone pACNR/FLYF (Bredenbeek et al., 2003) cut with the same restriction enzymes. Wild type YFV 17D and YFV-218 viruses were generated by electroporation of *in vitro* transcribed RNA. To this end, pACNR/FLYF and pYFV-218 were linearized with XhoI and transcribed using the SP6 mMESSAGE mMACHINE Kit (Ambion). About 3  $\mu$ l of RNA was electroporated into  $1 \times 10^6$  BHK-J cells resuspended into 100  $\mu$ l of serum free OPTI PRO™ SFM medium (Gibco) using a 2-mm gap electroporation cuvette (VWR). Electroporation was performed with a Gene Pulser Xcell (Bio-Rad) using the Pre-Set BHK21 protocol (square wave, 25 msec, 140 V, 1 puls). Recombinant virus was harvested 3 days after electroporation and viral titers were determined as described (Kummerer and Rice, 2002). For growth curve kinetics,  $5 \times 10^5$  cells (Vero or A549) were seeded in 35-mm-diameter dishes and infected the next day at a multiplicity of infection (moi) of 0.01 in PBS containing 1% FCS. One hour after infection, the inoculum was removed and complete growth media was added. Virus released into the supernatant was harvested at the indicated times and titered on BHK-J cells by plaque assay as described (Kummerer and Rice, 2002).

### **SUPPLEMENTARY DISCUSSION**

In our previous work, we observed an approximately 80% inhibition of RIG-I activation when 80% of GTP was substituted by a  $m^7$ GpppG cap analogue in the phage polymerase *in vitro* transcription reaction mix. At the time, this was intended to generate single-stranded RNA (Hornung et al., 2006), and we therefore interpreted these results as demonstrating that the  $m^7$ G cap exerts a strong block on RIG-I activation. In later studies we observed that the *in vitro* transcription process produces aberrant double stranded ppp-RNA containing side products, and that these are in fact the RNA species responsible for RIG-I activation (Schlee et al., 2009). These side products are generated by a RNA template-dependent transcription of complementary RNA (copy-back) by the phage polymerase. Because this copy-back side

reaction is not efficient, the concentration of active ligand in transcription mixes are very low, and, thus, <sup>m7</sup>G capping has a strong impact on RIG-I activation (In Figure 1C <sup>m7</sup>GpppG cap modified dsRNA is completely inactive at 0.5 nM ligand concentration, whereas pppG dsRNA induces approximately 7.5 ng/ml IFN- $\alpha$ . However, at 5nM <sup>m7</sup>GpppGA displays 75% of the activity of pppGA, and <sup>m7</sup>GpppG<sub>m</sub>A has no activity whatsoever.)

Conflicting results in another study suggest that there is no differential binding of RIG-I to 2'O-methylated capped RNA and capped RNA (Daffis et al., 2010). However, these observations are most probably also due to the aforementioned problems with RNA from *in vitro* transcription mixes leading to a lack of sensitivity and quantifiability of the assay (gel shift). Here, the authors generated "single-stranded" capped pppRNA by *in vitro* transcription. Since it is now accepted that single-stranded (non-base-paired) pppRNA represents a very weak RIG-I binder (Wang et al., 2010) and ligand (if one at all, reviewed in (Kolakofsky et al., 2012)), it could be assumed here as well that residual RIG-I activation and binding observed might have been induced by residual ppp-dsRNA side products. Moreover, in their assay, only one sequence of single-stranded HCV pppRNA was analyzed (Daffis et al., 2010). Since this sequence appeared to be a very weak RIG-I binder when possessing 5'ppp (Daffis et al., 2010), <sup>m7</sup>G capping (cap0) already reduced this weak binding to below the measurement threshold. Consequently, no difference in binding to cap0 and cap1 RNA could be detected.

A previous study did not observe a phenotype in HeLa cells with down-regulated MTr1 expression under normal or stress conditions (Belanger et al., 2010). However, the authors did not comment on the time frame and did not check RIG-I expression in HeLa cells. Our data suggest that primary cells are much more sensitive than tumor cells, which might have lost RIG-I function or downstream effector pathways upon tissue culture adaptation. On the other hand, extending usual *in vitro* experiment time frames could lead to further accumulation of RIG-I stimulating RNA causing a type I IFN background which would be hazardous to a whole organism but tolerable for *in vitro* cultured cells.

## SUPPLEMENTARY REFERENCES

Belanger, F., Stepinski, J., Darzynkiewicz, E., and Pelletier, J. (2010). Characterization of hMTr1, a human Cap1 2'-O-ribose methyltransferase. *J Biol Chem* 285, 33037-33044.

Bredenbeek, P.J., Kooi, E.A., Lindenbach, B., Huijkman, N., Rice, C.M., and Spaan, W.J. (2003). A stable full-length yellow fever virus cDNA clone and the role of conserved RNA elements in flavivirus replication. *The Journal of general virology* 84, 1261-1268.

Daffis, S., Szretter, K.J., Schriewer, J., Li, J., Youn, S., Errett, J., Lin, T.Y., Schneller, S., Zust, R., Dong, H., *et al.* (2010). 2'-O methylation of the viral mRNA cap evades host restriction by IFIT family members. *Nature* 468, 452-456.

Hornung, V., Ellegast, J., Kim, S., Brzozka, K., Jung, A., Kato, H., Poeck, H., Akira, S., Conzelmann, K.K., Schlee, M., *et al.* (2006). 5'-Triphosphate RNA is the ligand for RIG-I. *Science* 314, 994-997.

Kolakofsky, D., Kowalinski, E., and Cusack, S. (2012). A structure-based model of RIG-I activation. *RNA* 18, 2118-2127.

Kummerer, B.M., and Rice, C.M. (2002). Mutations in the yellow fever virus nonstructural protein NS2A selectively block production of infectious particles. *J Virol* 76, 4773-4784.

Schlee, M., Roth, A., Hornung, V., Hagmann, C.A., Wimmenauer, V., Barchet, W., Coch, C., Janke, M., Mihailovic, A., Wardle, G., *et al.* (2009). Recognition of 5' triphosphate by RIG-I helicase requires short blunt double-stranded RNA as contained in panhandle of negative-strand virus. *Immunity* 31, 25-34.

Wang, Y., Ludwig, J., Schuberth, C., Goldeck, M., Schlee, M., Li, H., Juranek, S., Sheng, G., Micura, R., Tuschl, T., *et al.* (2010). Structural and functional insights into 5'-ppp RNA pattern recognition by the innate immune receptor RIG-I. *Nat Struct Mol Biol* 17, 781-787.
